1 **Title**

2 The ERBB-STAT3 Axis Drives Tasmanian Devil Facial Tumor Disease

3

4 **Authors**

5 Lindsay Kosack<sup>1†</sup>, Bettina Wingelhofer<sup>2†</sup>, Alexandra Popa<sup>1†</sup>, Bojan Vilagos<sup>1</sup>, Anna Orlova<sup>2,3</sup>,  
6 Peter Majek<sup>1</sup>, Katja Parapatics<sup>1</sup>, Alexander Lercher<sup>1</sup>, Benedikt Agerer<sup>1</sup>, Anna Ringler<sup>1</sup>, Johanna  
7 Klughammer<sup>1</sup>, Mark Smyth<sup>1</sup>, Kseniya Khamina<sup>1</sup>, Hatoon Baazim<sup>1</sup>, David A. Rosa<sup>4</sup>, Jisung  
8 Park<sup>4</sup>, Patrick T. Gunning<sup>4</sup>, Christoph Bock<sup>1</sup>, Hannah V. Siddle<sup>5</sup>, Stefan Kubicek<sup>1</sup>, Elizabeth P.  
9 Murchison<sup>6</sup>, Keiryn L. Bennett<sup>1</sup>, Richard Moriggl<sup>2,3,7‡</sup>, Andreas Bergthaler<sup>1‡\*</sup>

10

11 **Affiliations**

12 <sup>1</sup> CeMM Research Center for Molecular Medicine of the Austrian Academy of Sciences, Vienna,  
13 Austria.

14 <sup>2</sup> Institute of Animal Breeding and Genetics, University of Veterinary Medicine Vienna, Austria.

15 <sup>3</sup> Ludwig Boltzmann Institute for Cancer Research, Vienna, Austria.

16 <sup>4</sup> University of Toronto, Mississauga, Canada.

17 <sup>5</sup> Department of Biological Science, University of Southampton, Southampton, United Kingdom

18 <sup>6</sup> Transmissible Cancer Group, Department of Veterinary Medicine, University of Cambridge,  
19 Cambridge, United Kingdom.

20 <sup>7</sup> Medical University of Vienna, Vienna, Austria.

21

22

1 **Author List Footnotes**

2 † These authors contributed equally.

3 ‡ Senior authors.

4 \* Lead contact.

5

6 **Contact Info**

7 Correspondence: [abergthaler@cemm.oeaw.ac.at](mailto:abergthaler@cemm.oeaw.ac.at).

8

9

10

1 **Summary**

2 The marsupial Tasmanian devil (*Sarcophilus harrisii*) faces extinction due to transmissible devil  
3 facial tumor disease (DFTD). To unveil the molecular underpinnings of DFTD, we designed an  
4 approach that combines sensitivity to drugs with an integrated systems-biology characterization.  
5 Sensitivity to inhibitors of the ERBB family of receptor tyrosine kinases correlated with their  
6 overexpression, suggesting a causative link. Proteomic and DNA methylation analyses revealed  
7 tumor-specific signatures linked to oncogenic signaling hubs including evolutionary conserved  
8 STAT3. Indeed, ERBB inhibition blocked phosphorylation of STAT3 and arrested cancer cells.  
9 Pharmacological blockade of ERBB signaling prevented tumor growth in a xenograft model and  
10 resulted in recovery of MHC class I gene expression. This link between the hyperactive ERBB-  
11 STAT3 axis and MHC class I mediated tumor immunosurveillance provides mechanistic insights  
12 into horizontal transmissibility and led us to the proposition of a dual chemo-immunotherapeutic  
13 strategy to save Tasmanian devils from DFTD.

14

15

16 **Keywords**

17 ERBB, STAT3, MHC class I, Receptor tyrosine kinases, Tasmanian devil, Transmissible cancer,  
18 Tumor vulnerability, Systems biology

19

## 1 **Introduction**

2 Cancer cells do not usually transmit between individuals. No human examples of transmissible  
3 cancers are known apart from rare iatrogenic cases during surgery and transplantation or  
4 materno-fetal transmission (Isoda et al., 2009; Metzger and Goff, 2016). Accordingly, horizontal  
5 transmission is not considered a hallmark of cancer (Hanahan and Weinberg, 2011). Yet, at least  
6 six species in the animal kingdom harbor clonal cancers which spread horizontally within  
7 populations (Metzger and Goff, 2016; Ostrander et al., 2016). These diseases include the fatal  
8 devil facial tumor disease (DFTD) in Tasmanian devils (Murchison et al., 2012; Murchison et al.,  
9 2010; Pearse and Swift, 2006), a sexually transmitted sarcoma in dogs (Murchison et al., 2014;  
10 Murgia et al., 2006), and leukemia-like cancers in mollusks (Metzger et al., 2015; Metzger et al.,  
11 2016). Genetic studies provided invaluable insights into these unusual cancers but the molecular  
12 underpinnings of malignancy and transmissibility remain poorly understood.

13 DFTD is an allogeneic graft of Schwann cell origin, which is transmitted by direct transfer of  
14 living cancer cells from one individual to another as a result of biting behavior during feeding or  
15 mating interactions (Murchison et al., 2010; Pearse and Swift, 2006). Diseased devils succumb to  
16 the disease within months (Loh et al., 2006), rendering DFTD a serious threat to the survival of  
17 the population of the largest living marsupial carnivore. Several mechanisms are thought to  
18 confer the tumor cells with the property of being successfully transmitted between individual  
19 Tasmanian devils, including the lack of rejection due to the low expression levels of MHC class I  
20 genes and diminished genetic diversity (Siddle et al., 2007; Siddle et al., 2013). Despite recent  
21 efforts vaccines and treatments showed limited success against DFTD (Kreiss et al., 2015; Tovar  
22 et al., 2017).

1 Here we undertook an integrative systems biology approach combining pharmacological drug  
2 screening, transcriptomics, epigenetics, proteomics and comparative pathology to unveil aberrant  
3 signaling pathways in DFTD. Specifically, we identified a critical role for persistent ERBB  
4 activation and signaling through STAT3, whose pharmacological inhibition resulted in arrested  
5 growth of DFTD cells and conferred protection in a tumor xenograft model. Blockade of the  
6 hyperactive ERBB-STAT3 axis led to recovery of MHC class I gene expression, suggesting a  
7 mechanistic link to transmissibility and rationalizing a therapeutic avenue to treat transmissible  
8 cancer in devils.

9

## 10 **Results**

### 11 *ERBB-specific vulnerability of DFTD identified by pharmacological screening*

12 To identify potential pharmacological vulnerabilities of DFTD, we performed a cell viability  
13 screen with over 2500 selected compounds against four DFTD and one fibroblast cell lines of  
14 Tasmanian devil origin on an automated high-throughput screening platform (**Table S1A**, see  
15 Supplementary Materials). 69 compounds killed at least one out of four DFTD cell lines but did  
16 not affect the viability of fibroblasts, as measured by intracellular ATP levels (**Fig. 1A**, **Table**  
17 **S2**). Interestingly, this unbiased approach yielded a substantial enrichment of tyrosine kinase  
18 inhibitors targeting the ERBB receptors (29/69; 42%) including Lapatinib, Erlotinib and  
19 Sapitinib (**Fig. 1B**, **Table S2**). Additional compound targets included histone deacetylases  
20 (HDAC), BET bromodomains and other potential therapeutic targets (**Fig. 1A**, **Table S2**). The  
21 human ERBB family has four members (EGFR, ERBB2, ERBB3, ERBB4) (Hynes and Lane,  
22 2005), of which the devil genome has all orthologs annotated except ERBB4. Interestingly,  
23 DFTD cells expressed higher transcript levels of *ERBB2* and *ERBB3* while *EGFR* was barely

1 detectable (**Fig. 1C**) compared to fibroblasts. To validate this finding on the protein level, we  
2 tested antibodies with cross-species recognition (**Table S3**). Western blot analysis confirmed  
3 increased levels of total ERBB2 and ERBB3 in DFTD cell lines compared with fibroblasts (**Fig.**  
4 **1D**). The phosphorylated residues Y1221/1222 (ERBB2) and Y1289 (ERBB3) are conserved  
5 across species (**Table S3**), highlighting the evolutionary impact of tyrosine kinase signaling in  
6 cancer cells. Phospho-site specific antibodies provided evidence for persistent activation of  
7 ERBB2 and ERBB3 (**Fig. 1D**). These results were corroborated by detection of increased  
8 expression of ERBB2 and ERBB3 in primary tumor biopsies of diseased Tasmanian devils, with  
9 tumor cells identified by the DFTD diagnostic marker Periaxin (PRX) (**Fig. 1E**) (Murchison et  
10 al., 2010). Together, this data indicates that DFTD cells express high levels of phosphorylated  
11 ERBB2 and ERBB3 that render them exquisitely vulnerable to ERBB kinase inhibitors.

12

### 13 *Characterization of DFTD by integrated proteomic and DNA methylation analysis*

14 To unravel the involved signaling cascades in DFTD, we investigated global changes in protein  
15 abundance in primary biopsies of diseased devils by mass-spectrometry-based proteomic  
16 analysis. This unbiased approach included DFTD tissue and paired healthy biopsies from skin  
17 and spleen from four Tasmanian devils from different geographical locations as well as nerve  
18 tissue and one DFTD cell line (**Table S1B**). Overall we identified 6672 unique proteins across all  
19 samples searched against a Uniprot reference library of the devil (**Fig. S1, Table S4A**). Principal  
20 component analysis (PCA) of the 3894 proteins quantified in all samples distinguished the  
21 replicates according to the tissue of origin, with the first principal component (PC1) accounting  
22 for 41.1% of the inter-sample variability differentiating tumor from healthy samples (**Fig. 2A**).  
23 Upon differential analysis of tumor vs. healthy tissues we defined a tumor-modulated signature

1 of 987 proteins (**Fig. 2B, Table S4A**). Among the most prominent proteins overexpressed in  
2 tumor tissue we identified the oncogenic transcription factor STAT3 and the STAT3 target gene  
3 Matrix Metalloproteinase 2 (MMP2) (**Fig. 2C**) (Xie et al., 2004). Tumor tissue also expressed  
4 high levels of the chromatin factors HDAC5 and TRIM28, which regulates STAT3 signaling  
5 (Tsuruma et al., 2008), and low expression of the tumor suppressor PTGIS (**Fig. 2C**). Further,  
6 we found high expression levels of the putative ERBB ligand epithelial growth factor like  
7 domain multiple 8 (EGFL8) (**Fig. 2C**).

8  
9 In complementation to the proteomic characterization we mapped DNA methylation by reduced  
10 representation bisulfite sequencing to depict the landscape of epigenetic regulation in the  
11 aforementioned samples of primary biopsies from Tasmanian devils. DNA methylation marks  
12 readily distinguished tumor and healthy tissue and identified tumor-specific methylation  
13 signatures and their putative transcription factor binding sites (**Fig. S2**). Differential analysis of  
14 tumor versus healthy biopsies highlighted 166 candidate genes with different DNA methylation  
15 levels in their promoters (**Fig. 2D-E, Table S5**), which included the tumor-specific  
16 hypomethylated *EGFL8* promoter as well as hypermethylated promoters of *Estrogen Receptor 1*  
17 (*ESR1*), *PTGIS* and the transcription factor *GATA3* (**Fig. 2E**). An integrative network analysis of  
18 the identified drug vulnerabilities, protein and methylation signatures revealed a high  
19 connectivity in the molecular wiring of DFTD (**Fig. 2F**). This suggested a critical involvement of  
20 central oncoprotein hubs consisting of STAT3, TRIM28 and others, which may be triggered by  
21 ERBB kinase action.

22  
23 *Molecular dissection of ERBB-STAT3 axis in DFTD*

1 The proteomic tumor signatures revealed increased levels of STAT3, which can become  
2 activated by ERBB receptor tyrosine kinase signaling, as well as an enrichment of STAT3 target  
3 genes (**Fig. 2C**, **Fig. S1D-F**, **Table S4C**). Due to the central roles of STAT3 in cancer and  
4 immunity (Villarino et al., 2017; Yu et al., 2014) and the highly conserved amino acid sequences  
5 of STAT3 between *H. sapiens* and *S. harrisii* (99.09%), we investigated the levels of expression  
6 and activation of STAT3 by Western blot. STAT3 is activated by phosphorylation of residues  
7 Y705 and S727. We, thus, tested antibodies specific to these phosphorylated residues of STAT3  
8 and found highly increased STAT3 phosphorylation of both residues in DFTD tumor cells  
9 compared to fibroblasts (**Fig. 3A**, **Table S3**). Interestingly, we also found a robust up-regulation  
10 of protein tyrosine phosphorylation compared to fibroblasts (**Fig. S3**), indicating increased  
11 tyrosine kinase signaling. ERBB family members activate RAS-RAF-MAPK/ERK, which in turn  
12 phosphorylates STAT3 at S727 (Chung et al., 1997). Indeed, we detected increased ERK1/2  
13 phosphorylation in DFTD tumor cells (**Fig. 3B**). STAT3 phosphorylation was corroborated by  
14 immunohistochemical stainings in primary tumor biopsies (**Fig. 3C**). Further, treatment with the  
15 covalent STAT3-specific SH2-domain inhibitor PG-S3-009 (Garg et al., 2017) resulted in DFTD  
16 cell-specific killing (**Fig. 3D**) and led to reduced expression of ERBB2 (**Fig. 3E**). Intriguingly,  
17 treatment with the ERBB inhibitors Lapatinib and Sapitinib inhibited serine and tyrosine  
18 phosphorylation of STAT3 (**Fig. 3F**), providing further support for a hyperactivated ERBB-  
19 STAT3 axis in DFTD pathogenesis.

20

21 Variant analysis from high-coverage RNA-seq did not provide evidence for activating  
22 mutations in expressed devil orthologous genes involved in the ERBB and STAT3 pathway  
23 (**Fig. S4**, **Table S6**). Further expression analysis of ERBB-related genes identified increased



1 expression of the positive regulators ERBIN and CPNE3 while the negative regulators EREG  
2 and PTPN12 were expressed at lower levels (**Fig. S5A, Table S7**). Moreover, DFTD tumors  
3 and cells expressed elevated levels of the ERBB ligands EGF, HBEGF and NRG1 (**Fig. S5A,**  
4 **Table S7**). This included increased amounts of transcripts and protein of EGFL8 (**Fig. 2C,**  
5 **Fig. S5A-B and Table S4A**), with its promoter being significantly hypomethylated in primary  
6 tumor tissues (**Fig. 2E, Table S5**). Notably, we also found abolished expression of the  
7 suppressor of cytokine signaling 1 (SOCS1) in DFTD tumor cells (**Fig. S5C-D**), a known  
8 inhibitor of STAT3 activation (Song and Shuai, 1998). In summary, our results suggest that  
9 DFTD tumor cells exhibit an ERBB-dependent constitutive activation of STAT3 in a positive  
10 feed-forward loop.

11

#### 12 *Hyperactivated ERBB-STAT3 reduces expression of MHC class I related genes*

13 Transmissibility of DFTD has been linked to reduced expression of MHC class I genes (Siddle  
14 and Kaufman, 2013), which prompted us to assess a potential link between hyperactive  
15 ERBB-STAT3 and MHC class I gene expression. To this end we stimulated DFTD tumor cells  
16 with recombinant autologous interferon ( $\text{rIFN}\gamma$ ). This induced the expression of *b2-*  
17 *microglobulin (B2M)* and *MHC-I* as shown previously (**Fig. 4A**) (Siddle and Kaufman, 2013).  
18 Importantly, concomitant treatment with the ERBB-inhibitor Sunitinib amplified increased  
19 expression of *B2M* and *MHC-I* (**Fig. 4A-B, Fig. S6**). In addition, we observed increased  
20 expression of *STAT1* and a trend towards reduced *STAT3* expression upon treatment with  
21  $\text{rIFN}\gamma$  and Sunitinib (**Fig. 4A, Fig. S6**). *B2M* and *MHC-I* are bonafide STAT1 target genes.  
22 Thus, we hypothesized that high levels of STAT3 may interfere with STAT1 transcriptional

1 regulation. Indeed, reciprocal co-immunoprecipitation confirmed physical interaction between  
2 STAT3 and STAT1 (**Fig. 4B**).

3

4 To test the effects of ERBB inhibition *in vivo*, we transplanted DFTD cells subcutaneously  
5 into the flanks of NOD scid gamma (NSG) mice and treated them with 50 mg/kg Sapitinib or  
6 vehicle as control. DFTD xenografts in the control group proliferated rapidly after  
7 transplantation while treatment with Sapitinib effectively stalled tumor growth (**Fig. 4C-D**).  
8 No drug toxicity was observed as assessed by the serum concentration of the liver  
9 transaminases alanine aminotransferase and aspartate aminotransferase and the kidney  
10 parameter blood urea nitrogen (**Fig. S7A-C**) and by histopathology (**Fig. S7D**). The observed  
11 anti-tumor effect of Sapitinib was corroborated by histological analysis of tumor tissue for  
12 total STAT3, pS-STAT3, pY-STAT3 as well as staining for Ki67 and Cleaved Caspase 3 (**Fig.**  
13 **4E**). In line with our previous results *in vitro*, DFTD xenograft tumors from mice treated with  
14 Sapitinib showed reduced STAT3 serine and tyrosine phosphorylation and increased  
15 expression of B2M (**Fig. 4F-G**). Together, this suggests that the ERBB-STAT3 axis drives  
16 cancer cell growth and facilitates tumor immune evasion through suppression of MHC class I  
17 gene expression.

18

19

## 20 **Discussion**

21 ERBB signalling is influenced by ligand-induced activation and triggers downstream processes  
22 such as context-dependent activation of transcriptional regulators including members of the  
23 activator protein-1 family (AP-1, also *bona fide* STAT3 targets), ETS, and STAT3/5

1 transcription factors (Lemmon et al., 2014; Schneider and Yarden, 2016). ERBB family  
2 members themselves are frequently overexpressed, amplified or mutated in human solid cancers  
3 and are targets of clinical therapies (Appert-Collin et al., 2015; Bae and Schlessinger, 2010;  
4 Roskoski, 2014; Yarden and Pines, 2012). In Schwann cells, ERBB2/3 signalling regulates  
5 expansion and migration of progenitor cells as well as different functions in myelination and  
6 repair of axons (Corfas et al., 2004; Newbern and Birchmeier, 2010; Stassart et al., 2013).  
7 Moreover, we found increased expression of proteins associated with epithelial to mesenchymal  
8 transition (EMT) process in DFTD tumors which are also upregulated in Schwann cells upon  
9 nerve injury to support axon regeneration (Chen et al., 2007; Ferguson and Muir, 2000; Weiss et  
10 al., 2016). This included the EMT-inducing zinc-finger E-box-binding homeobox factor (ZEB2)  
11 (Comijn et al., 2001) and the STAT3 target MMP2 (**Fig. 2C**), which enhances the degradation  
12 of extracellular matrix proteins and cancer cell invasion (Nistico et al., 2012). The regenerative  
13 properties of Schwann cells are highly linked to their plasticity whereby upon nerve injury, they  
14 reversibly de-differentiate, acquire high motility and guide the growth of the damaged axons  
15 (Kim et al., 2013). Thus, the identification of hyperactivated ERBB-STAT3 signalling in DFTD  
16 may suggest aberrant regulation of the Schwann cell-intrinsic repair program (Arthur-Farraj et  
17 al., 2017). Of note, an independently arisen second clonal transmissible tumor has been  
18 described in Tasmanian devils, which is pathologically similar but stains negative for the  
19 Schwann cell marker PRX (Pye et al., 2016). It will be interesting to investigate the involvement  
20 of similar driver tyrosine kinase-STAT3 pathways blocking MHC class I.

21

22 A major enigmatic question of DFTD concerns the molecular properties that are required for  
23 transmission between individuals to explain the lack of rejection. Changes in MHC class I

1 expression and diversity have been described in transmissible tumors of both devils and dogs  
2 (Belov, 2011). Of note, recent immunotherapy trials with MHC-induced DFTD cells showed  
3 immunogenicity *in vivo* (Tovar et al., 2017). Our data indicate that targeting of the  
4 hyperactivated ERBB-STAT3 axis re-establishes the expression of MHC class I, thus facilitating  
5 MHC-mediated tumor immunosurveillance in Tasmanian devils (**Fig. 5**). Promoters of  
6 interferon-stimulated MHC class I related genes are targets for STAT1, while STAT3 is known  
7 to interfere with transcription by sequestering STAT1 in the cytoplasm through  
8 heterodimerization (Friedrich et al., 2017; Nivarthi et al., 2016; Stancato et al., 1996). We  
9 hypothesize that the endogenous tonic interferon-STAT-MHC class I axis in DFTD is disrupted  
10 due to high STAT3 action promoting cancer cell proliferation, survival and invasion. These  
11 findings may bear relevance for other transmissible cancers in higher organisms including dogs,  
12 whose transmissible tumor lacks B2M and shows low MHC class I surface expression (Cohen et  
13 al., 1984; Murgia et al., 2006).

14

15 We wish to acknowledge that molecular investigations of non-model organisms can be  
16 notoriously hampered by imperfect genome annotations, orthology inferences and lack of  
17 reagents. In this study we addressed this by an integrative and unbiased systems biology  
18 approach of pharmacological screens, proteomics, epigenomics and transcriptomics. In addition,  
19 we complemented this by comparative pathology for which we exploited the high degree of  
20 conservation of key oncoproteins driving human cancer cross-validating a similar driver  
21 oncogene scenario in devils.

22 Our data indicate a positive feedback loop between ERBB receptor tyrosine kinases and STAT3  
23 (**Fig. 3C-E**). The underlying mechanism of maintained STAT3 activation and the apparent lack

1 of negative regulation requires further investigation. Mutually not exclusive, the involved  
2 processes may include recently detected copy gains of ERBB3 (Hayes et al., 2017; Taylor et al.,  
3 2017) leading to enhanced ERBB2-ERBB3 heterodimer activity, the secretion of ligands of the  
4 ERBB family, blunted negative control by phosphatases or the SOCS-ubiquitin pathway (**Fig.**  
5 **S5**). Serine phosphorylation of STAT3 is associated with RAS-RAF signalling and  
6 mitochondrial ATP production and this was also blocked by the ERBB inhibitor Sunitinib  
7 (Gough et al., 2009). The integrated and unbiased systems-level analysis presented in this study  
8 is expected to provide a critical foundation for further investigations and it raises general  
9 questions about the tumor biology and transmissibility of such cancers in other species. The  
10 implicated canonical cancer signatures apparently do not suffice to give rise to transmissible  
11 cancers in humans. Thus, it should be emphasized that the occurrence of transmissible cancers in  
12 mammals are likely to depend on a complex combination of molecular as well as non-  
13 molecular context-dependent features such as aggressive behaviour, tissue wounding and  
14 population dynamics (Epstein et al., 2016).

15

16 Blocking the ERBB-STAT3 axis may present a promising drug target whose interference  
17 arrests cancer cells and at the same time leads to increased tumor surveillance through re-  
18 expression of MHC class I (Garrido et al., 2016). While pharmacological treatments come  
19 with inherent logistic limitations for wildlife diseases, this rationalized therapeutic strategy –  
20 possibly in combination with a vaccine against DFTD and/or immunotherapeutic  
21 interventions- offers a much-needed expansion of the so far limited measures to preserve the  
22 Tasmanian devil from extinction.

23

1

## 2 **Acknowledgements**

3 The data reported in this paper are tabulated in the Supplemental Information and archived at the  
4 following databases: proteomic data in the PRoteomics IDEentification (PRIDE) database with  
5 accession number (1-20180126-165173), DNA methylation data in the Gene Expression  
6 Omnibus (GEO) database with accession number (GSE108160) and RNA-seq data in the GEO  
7 database with accession number (GSE108107).

8 We thank Gregory M. Woods for provision of samples, Thomas Penz and the Biomedical  
9 Sequencing Facility at CeMM and Fiorella Schischlik with technical support for sequencing and  
10 analysis, Kathrin Runggatscher for technical support with the drug screen, Young Mi Kwon and  
11 Jinhong Wang with logistical support, and Michael Moschinger and Theresa Pinter for  
12 discussions. We thank Safia Zahma for histopathology and immunohistochemistry processing,  
13 and Thomas Grunt and Herwig Moll for advice on reagents for ERBB family members.

14 The authors like to thank Ruedi Aebersold, Lukas Flatz, Stephen P. Goff, Nancy Hynes,  
15 Christopher Schliehe, Giulio Superti-Furga and Rolf M. Zinkernagel for valuable feedback and  
16 discussions.

17 This work was supported by funding from the Austrian Academy of Sciences (A.B.). B.W. and  
18 R.M. received funding via FWF SFB F4707-B20 and SFB-F06105. A.O. is supported by the  
19 Austrian Research Promotion Agency (FFG, # 854452).

20

## 21 **Author Contributions**

1 L.K., B.W., B.V., A.L., K.P., B.A., A.O., A.R. and J.K. conducted the experiments and analysed  
2 data. A.P., P.M., K.K., H.B., C.B., S.K., K.B., R.M. and A.B. analysed data. D.A.R., J.P., H.V.S.  
3 and E.P.M. provided material. L.K., A.P., B.V., R.M. and A.B. wrote the manuscript. A.B.  
4 conceived and supervised the study.

5

## 6 **Declaration of Interests**

7 The authors declare no competing interests.

8

## 1 **References**

2

3 Anders, S., Pyl, P. T., and Huber, W. (2015). HTSeq--a Python framework to work with high-  
4 throughput sequencing data. *Bioinformatics* *31*, 166-169.

5 Appert-Collin, A., Hubert, P., Cremel, G., and Bennisroune, A. (2015). Role of ErbB Receptors  
6 in Cancer Cell Migration and Invasion. *Front Pharmacol* *6*, 283.

7 Arthur-Farraj, P. J., Morgan, C. C., Adamowicz, M., Gomez-Sanchez, J. A., Fazal, S. V.,  
8 Beucher, A., Razzaghi, B., Mirsky, R., Jessen, K. R., and Aitman, T. J. (2017). Changes in the  
9 Coding and Non-coding Transcriptome and DNA Methylome that Define the Schwann Cell  
10 Repair Phenotype after Nerve Injury. *Cell Rep* *20*, 2719-2734.

11 Assenov, Y., Muller, F., Lutsik, P., Walter, J., Lengauer, T., and Bock, C. (2014).

12 Comprehensive analysis of DNA methylation data with RnBeads. *Nat Methods* *11*, 1138-1140.

13 Bae, J. H., and Schlessinger, J. (2010). Asymmetric tyrosine kinase arrangements in activation or  
14 autophosphorylation of receptor tyrosine kinases. *Mol Cells* *29*, 443-448.

15 Belov, K. (2011). The role of the Major Histocompatibility Complex in the spread of contagious  
16 cancers. *Mamm Genome* *22*, 83-90.

17 Bennett, K. L., Funk, M., Tschernutter, M., Breitwieser, F. P., Panyavsky, M., Ubaida Mohien,  
18 C., Muller, A., Trajanoski, Z., Colinge, J., Superti-Furga, G., and Schmidt-Erfurth, U. (2011).

19 Proteomic analysis of human cataract aqueous humour: Comparison of one-dimensional gel  
20 LCMS with two-dimensional LCMS of unlabelled and iTRAQ(R)-labelled specimens. *J*  
21 *Proteomics* *74*, 151-166.

22 Bolger, A. M., Lohse, M., and Usadel, B. (2014). Trimmomatic: a flexible trimmer for Illumina  
23 sequence data. *Bioinformatics* *30*, 2114-2120.

24 Chen, Z. L., Yu, W. M., and Strickland, S. (2007). Peripheral regeneration. *Annu Rev Neurosci*  
25 *30*, 209-233.

26 Chung, J., Uchida, E., Grammer, T. C., and Blenis, J. (1997). STAT3 serine phosphorylation by  
27 ERK-dependent and -independent pathways negatively modulates its tyrosine phosphorylation.  
28 *Mol Cell Biol* *17*, 6508-6516.

29 Cingolani, P., Platts, A., Wang le, L., Coon, M., Nguyen, T., Wang, L., Land, S. J., Lu, X., and  
30 Ruden, D. M. (2012). A program for annotating and predicting the effects of single nucleotide



- 1 polymorphisms, SnpEff: SNPs in the genome of *Drosophila melanogaster* strain w1118; iso-2;  
2 iso-3. *Fly (Austin)* 6, 80-92.
- 3 Cohen, D., Shalev, A., and Krup, M. (1984). Lack of beta 2-microglobulin on the surface of  
4 canine transmissible venereal tumor cells. *J Natl Cancer Inst* 72, 395-401.
- 5 Comijn, J., Berx, G., Vermassen, P., Verschueren, K., van Grunsven, L., Bruyneel, E., Mareel,  
6 M., Huylebroeck, D., and van Roy, F. (2001). The two-handed E box binding zinc finger protein  
7 SIP1 downregulates E-cadherin and induces invasion. *Mol Cell* 7, 1267-1278.
- 8 Corfas, G., Velardez, M. O., Ko, C. P., Ratner, N., and Peles, E. (2004). Mechanisms and roles  
9 of axon-Schwann cell interactions. *J Neurosci* 24, 9250-9260.
- 10 Dobin, A., Davis, C. A., Schlesinger, F., Drenkow, J., Zaleski, C., Jha, S., Batut, P., Chaisson,  
11 M., and Gingeras, T. R. (2013). STAR: ultrafast universal RNA-seq aligner. *Bioinformatics* 29,  
12 15-21.
- 13 Eng, J. K., McCormack, A. L., and Yates, J. R. (1994). An approach to correlate tandem mass  
14 spectral data of peptides with amino acid sequences in a protein database. *J Am Soc Mass*  
15 *Spectrom* 5, 976-989.
- 16 Epstein, B., Jones, M., Hamede, R., Hendricks, S., McCallum, H., Murchison, E. P., Schonfeld,  
17 B., Wiench, C., Hohenlohe, P., and Storfer, A. (2016). Rapid evolutionary response to a  
18 transmissible cancer in Tasmanian devils. *Nat Commun* 7, 12684.
- 19 Ferguson, T. A., and Muir, D. (2000). MMP-2 and MMP-9 increase the neurite-promoting  
20 potential of schwann cell basal laminae and are upregulated in degenerated nerve. *Mol Cell*  
21 *Neurosci* 16, 157-167.
- 22 Friedrich, K., Dolznig, H., Han, X., and Moriggl, R. (2017). Steering of carcinoma progression  
23 by the YIN/YANG interaction of STAT1/STAT3. *Biosci Trends* 11, 1-8.
- 24 Garg, N., Bakhshinyan, D., Venugopal, C., Mahendram, S., Rosa, D. A., Vijayakumar, T.,  
25 Manoranjan, B., Hallett, R., McFarlane, N., Delaney, K. H., *et al.* (2017). CD133+ brain tumor-  
26 initiating cells are dependent on STAT3 signaling to drive medulloblastoma recurrence.  
27 *Oncogene* 36, 606-617.
- 28 Garrido, F., Aptsiauri, N., Doorduijn, E. M., Garcia Lora, A. M., and van Hall, T. (2016). The  
29 urgent need to recover MHC class I in cancers for effective immunotherapy. *Curr Opin Immunol*  
30 39, 44-51.

- 1 Gough, D. J., Corlett, A., Schlessinger, K., Wegrzyn, J., Lerner, A. C., and Levy, D. E. (2009).  
2 Mitochondrial STAT3 supports Ras-dependent oncogenic transformation. *Science* *324*, 1713-  
3 1716.
- 4 Hanahan, D., and Weinberg, R. A. (2011). Hallmarks of cancer: the next generation. *Cell* *144*,  
5 646-674.
- 6 Hastie, T., Tibshirani, R., Narasimhan, B., and Chu, G. (2017). impute: impute: Imputation for  
7 microarray data. . R package version 1501.
- 8 Hayes, D. A., Kunde, D. A., Taylor, R. L., Pyecroft, S. B., Sohal, S. S., and Snow, E. T. (2017).  
9 ERBB3: A potential serum biomarker for early detection and therapeutic target for devil facial  
10 tumour 1 (DFT1). *PLoS One* *12*, e0177919.
- 11 Huber, W., von Heydebreck, A., Sultmann, H., Poustka, A., and Vingron, M. (2002). Variance  
12 stabilization applied to microarray data calibration and to the quantification of differential  
13 expression. *Bioinformatics* *18 Suppl 1*, S96-104.
- 14 Hynes, N. E., and Lane, H. A. (2005). ERBB receptors and cancer: the complexity of targeted  
15 inhibitors. *Nat Rev Cancer* *5*, 341-354.
- 16 Isoda, T., Ford, A. M., Tomizawa, D., van Delft, F. W., De Castro, D. G., Mitsuiki, N., Score, J.,  
17 Taki, T., Morio, T., Takagi, M., *et al.* (2009). Immunologically silent cancer clone transmission  
18 from mother to offspring. *Proc Natl Acad Sci U S A* *106*, 17882-17885.
- 19 Kall, L., Canterbury, J. D., Weston, J., Noble, W. S., and MacCoss, M. J. (2007). Semi-  
20 supervised learning for peptide identification from shotgun proteomics datasets. *Nat Methods* *4*,  
21 923-925.
- 22 Kall, L., Storey, J. D., and Noble, W. S. (2009). QUALITY: non-parametric estimation of q-  
23 values and posterior error probabilities. *Bioinformatics* *25*, 964-966.
- 24 Kersey, P., Hermjakob, H., and Apweiler, R. (2000). VARSPLIC: alternatively-spliced protein  
25 sequences derived from SWISS-PROT and TrEMBL. *Bioinformatics* *16*, 1048-1049.
- 26 Kim, H. A., Mindos, T., and Parkinson, D. B. (2013). Plastic fantastic: Schwann cells and repair  
27 of the peripheral nervous system. *Stem Cells Transl Med* *2*, 553-557.
- 28 Klughammer, J., Datlinger, P., Printz, D., Sheffield, N. C., Farlik, M., Hadler, J., Fritsch, G., and  
29 Bock, C. (2015). Differential DNA Methylation Analysis without a Reference Genome. *Cell Rep*  
30 *13*, 2621-2633.

- 1 Kreiss, A., Brown, G. K., Tovar, C., Lyons, A. B., and Woods, G. M. (2015). Evidence for  
2 induction of humoral and cytotoxic immune responses against devil facial tumor disease cells in  
3 Tasmanian devils (*Sarcophilus harrisii*) immunized with killed cell preparations. *Vaccine* *33*,  
4 3016-3025.
- 5 Lemmon, M. A., Schlessinger, J., and Ferguson, K. M. (2014). The EGFR family: not so  
6 prototypical receptor tyrosine kinases. *Cold Spring Harb Perspect Biol* *6*, a020768.
- 7 Loh, R., Bergfeld, J., Hayes, D., O'Hara, A., Pyecroft, S., Raidal, S., and Sharpe, R. (2006). The  
8 pathology of devil facial tumor disease (DFTD) in Tasmanian Devils (*Sarcophilus harrisii*). *Vet*  
9 *Pathol* *43*, 890-895.
- 10 Love, M. I., Huber, W., and Anders, S. (2014). Moderated estimation of fold change and  
11 dispersion for RNA-seq data with DESeq2. *Genome Biol* *15*, 550.
- 12 Metzger, M. J., and Goff, S. P. (2016). A Sixth Modality of Infectious Disease: Contagious  
13 Cancer from Devils to Clams and Beyond. *PLoS Pathog* *12*, e1005904.
- 14 Metzger, M. J., Reinisch, C., Sherry, J., and Goff, S. P. (2015). Horizontal transmission of clonal  
15 cancer cells causes leukemia in soft-shell clams. *Cell* *161*, 255-263.
- 16 Metzger, M. J., Villalba, A., Carballal, M. J., Iglesias, D., Sherry, J., Reinisch, C., Muttray, A. F.,  
17 Baldwin, S. A., and Goff, S. P. (2016). Widespread transmission of independent cancer lineages  
18 within multiple bivalve species. *Nature* *534*, 705-709.
- 19 Murchison, E. P., Schulz-Trieglaff, O. B., Ning, Z., Alexandrov, L. B., Bauer, M. J., Fu, B.,  
20 Hims, M., Ding, Z., Ivakhno, S., Stewart, C., *et al.* (2012). Genome sequencing and analysis of  
21 the Tasmanian devil and its transmissible cancer. *Cell* *148*, 780-791.
- 22 Murchison, E. P., Tovar, C., Hsu, A., Bender, H. S., Kheradpour, P., Rebbeck, C. A., Obendorf,  
23 D., Conlan, C., Bahlo, M., Blizzard, C. A., *et al.* (2010). The Tasmanian devil transcriptome  
24 reveals Schwann cell origins of a clonally transmissible cancer. *Science* *327*, 84-87.
- 25 Murchison, E. P., Wedge, D. C., Alexandrov, L. B., Fu, B., Martincorena, I., Ning, Z., Tubio, J.  
26 M. C., Werner, E. I., Allen, J., De Nardi, A. B., *et al.* (2014). Transmissible [corrected] dog  
27 cancer genome reveals the origin and history of an ancient cell lineage. *Science* *343*, 437-440.
- 28 Murgia, C., Pritchard, J. K., Kim, S. Y., Fassati, A., and Weiss, R. A. (2006). Clonal origin and  
29 evolution of a transmissible cancer. *Cell* *126*, 477-487.
- 30 Newbern, J., and Birchmeier, C. (2010). Nrg1/ErbB signaling networks in Schwann cell  
31 development and myelination. *Semin Cell Dev Biol* *21*, 922-928.

- 1 Nistico, P., Bissell, M. J., and Radisky, D. C. (2012). Epithelial-mesenchymal transition: general  
2 principles and pathological relevance with special emphasis on the role of matrix  
3 metalloproteinases. *Cold Spring Harb Perspect Biol* 4.
- 4 Nivarthi, H., Gordziel, C., Themanns, M., Kramer, N., Eberl, M., Rabe, B., Schleder, M.,  
5 Rose-John, S., Knosel, T., Kenner, L., *et al.* (2016). The ratio of STAT1 to STAT3 expression is  
6 a determinant of colorectal cancer growth. *Oncotarget* 7, 51096-51106.
- 7 Olsen, J. V., de Godoy, L. M., Li, G., Macek, B., Mortensen, P., Pesch, R., Makarov, A., Lange,  
8 O., Horning, S., and Mann, M. (2005). Parts per million mass accuracy on an Orbitrap mass  
9 spectrometer via lock mass injection into a C-trap. *Mol Cell Proteomics* 4, 2010-2021.
- 10 Ostrander, E. A., Davis, B. W., and Ostrander, G. K. (2016). Transmissible Tumors: Breaking  
11 the Cancer Paradigm. *Trends Genet* 32, 1-15.
- 12 Pearse, A. M., and Swift, K. (2006). Allograft theory: transmission of devil facial-tumour  
13 disease. *Nature* 439, 549.
- 14 Perkins, D. N., Pappin, D. J., Creasy, D. M., and Cottrell, J. S. (1999). Probability-based protein  
15 identification by searching sequence databases using mass spectrometry data. *Electrophoresis* 20,  
16 3551-3567.
- 17 Pye, R. J., Pemberton, D., Tovar, C., Tubio, J. M., Dun, K. A., Fox, S., Darby, J., Hayes, D.,  
18 Knowles, G. W., Kreiss, A., *et al.* (2016). A second transmissible cancer in Tasmanian devils.  
19 *Proc Natl Acad Sci U S A* 113, 374-379.
- 20 Ritchie, M. E., Phipson, B., Wu, D., Hu, Y., Law, C. W., Shi, W., and Smyth, G. K. (2015).  
21 limma powers differential expression analyses for RNA-sequencing and microarray studies.  
22 *Nucleic Acids Res* 43, e47.
- 23 Roskoski, R., Jr. (2014). The ErbB/HER family of protein-tyrosine kinases and cancer.  
24 *Pharmacol Res* 79, 34-74.
- 25 Schneider, M. R., and Yarden, Y. (2016). The EGFR-HER2 module: a stem cell approach to  
26 understanding a prime target and driver of solid tumors. *Oncogene* 35, 2949-2960.
- 27 Sdelci, S., Lardeau, C. H., Tallant, C., Klepsch, F., Klaiher, B., Bennett, J., Rathert, P., Schuster,  
28 M., Penz, T., Fedorov, O., *et al.* (2016). Mapping the chemical chromatin reactivation landscape  
29 identifies BRD4-TAF1 cross-talk. *Nat Chem Biol* 12, 504-510.
- 30 Siddle, H. V., and Kaufman, J. (2013). How the devil facial tumor disease escapes host immune  
31 responses. *Oncoimmunology* 2, e25235.

- 1 Siddle, H. V., Kreiss, A., Eldridge, M. D., Noonan, E., Clarke, C. J., Pyecroft, S., Woods, G. M.,  
2 and Belov, K. (2007). Transmission of a fatal clonal tumor by biting occurs due to depleted  
3 MHC diversity in a threatened carnivorous marsupial. *Proc Natl Acad Sci U S A* *104*, 16221-  
4 16226.
- 5 Siddle, H. V., Kreiss, A., Tovar, C., Yuen, C. K., Cheng, Y., Belov, K., Swift, K., Pearse, A. M.,  
6 Hamede, R., Jones, M. E., *et al.* (2013). Reversible epigenetic down-regulation of MHC  
7 molecules by devil facial tumour disease illustrates immune escape by a contagious cancer. *Proc*  
8 *Natl Acad Sci U S A* *110*, 5103-5108.
- 9 Song, M. M., and Shuai, K. (1998). The suppressor of cytokine signaling (SOCS) 1 and SOCS3  
10 but not SOCS2 proteins inhibit interferon-mediated antiviral and antiproliferative activities. *J*  
11 *Biol Chem* *273*, 35056-35062.
- 12 Stancato, L. F., David, M., Carter-Su, C., Lerner, A. C., and Pratt, W. B. (1996). Preassociation  
13 of STAT1 with STAT2 and STAT3 in separate signalling complexes prior to cytokine  
14 stimulation. *J Biol Chem* *271*, 4134-4137.
- 15 Stassart, R. M., Fledrich, R., Velanac, V., Brinkmann, B. G., Schwab, M. H., Meijer, D., Sereda,  
16 M. W., and Nave, K. A. (2013). A role for Schwann cell-derived neuregulin-1 in remyelination.  
17 *Nat Neurosci* *16*, 48-54.
- 18 Taylor, R. L., Zhang, Y., Schoning, J. P., and Deakin, J. E. (2017). Identification of candidate  
19 genes for devil facial tumour disease tumorigenesis. *Sci Rep* *7*, 8761.
- 20 Tovar, C., Pye, R. J., Kreiss, A., Cheng, Y., Brown, G. K., Darby, J., Malley, R. C., Siddle, H.  
21 V., Skjodt, K., Kaufman, J., *et al.* (2017). Regression of devil facial tumour disease following  
22 immunotherapy in immunised Tasmanian devils. *Sci Rep* *7*, 43827.
- 23 Tsuruma, R., Ohbayashi, N., Kamitani, S., Ikeda, O., Sato, N., Muromoto, R., Sekine, Y.,  
24 Oritani, K., and Matsuda, T. (2008). Physical and functional interactions between STAT3 and  
25 KAP1. *Oncogene* *27*, 3054-3059.
- 26 Van der Auwera, G. A., Carneiro, M. O., Hartl, C., Poplin, R., Del Angel, G., Levy-Moonshine,  
27 A., Jordan, T., Shakir, K., Roazen, D., Thibault, J., *et al.* (2013). From FastQ data to high  
28 confidence variant calls: the Genome Analysis Toolkit best practices pipeline. *Curr Protoc*  
29 *Bioinformatics* *43*, 11 10 11-33.
- 30 Villarino, A. V., Kanno, Y., and O'Shea, J. J. (2017). Mechanisms and consequences of Jak-  
31 STAT signaling in the immune system. *Nat Immunol* *18*, 374-384.

- 1 Weiss, T., Taschner-Mandl, S., Bileck, A., Slany, A., Kromp, F., Rifatbegovic, F., Frech, C.,  
2 Windhager, R., Kitzinger, H., Tzou, C. H., *et al.* (2016). Proteomics and transcriptomics of  
3 peripheral nerve tissue and cells unravel new aspects of the human Schwann cell repair  
4 phenotype. *Glia* *64*, 2133-2153.
- 5 Wisniewski, J. R., Zougman, A., Nagaraj, N., and Mann, M. (2009). Universal sample  
6 preparation method for proteome analysis. *Nat Methods* *6*, 359-362.
- 7 Xie, T. X., Wei, D., Liu, M., Gao, A. C., Ali-Osman, F., Sawaya, R., and Huang, S. (2004). Stat3  
8 activation regulates the expression of matrix metalloproteinase-2 and tumor invasion and  
9 metastasis. *Oncogene* *23*, 3550-3560.
- 10 Yarden, Y., and Pines, G. (2012). The ERBB network: at last, cancer therapy meets systems  
11 biology. *Nat Rev Cancer* *12*, 553-563.
- 12 Yu, H., Lee, H., Herrmann, A., Buettner, R., and Jove, R. (2014). Revisiting STAT3 signalling in  
13 cancer: new and unexpected biological functions. *Nat Rev Cancer* *14*, 736-746.
- 14  
15

## 1 **Figure Legends**

2

### 3 **Fig. 1: A pharmacological screen identified ERBB-specific vulnerability of DFTD**

4 (A) 4-point dose-response drug screening reveals an increased response of DFTD cell lines to  
5 ERBB-family inhibitors (29/69 drugs). The targets of the 69 drug hits in the 4-point drug screen  
6 showing a reduction in cell viability in at least 1 of the 4 DFTD cell lines compared to healthy  
7 fibroblast. (B) 8-point dose-response curves for Lapatinib, Erlotinib and Sapitinib show response  
8 to the ERBB targeting drugs in 4 tumor cell lines (T1-4) compared to fibroblasts (Fib.). (C)  
9 Expression of the ERBB family members quantified by real-time PCR. (D) Western blots of the  
10 3 annotated ERBB proteins (total and phosphorylated). (E) Histopathological analysis of tumor  
11 biopsies for Hematoxylin and Eosin (H&E) and immunohistochemistry against Periaxin  
12 (PRX), ERBB2 and ERBB3 on serial consecutive sections.

13

### 14 **Fig. 2: Integrative systems-level analysis of DFTD**

15 (A) Principal component analysis of the 3894 proteins quantified in all samples. Sampling  
16 locations are indicated in capital letters (C Cradle Mountain, K Kempton, N Narawntapu, W  
17 Wisedale). Cell line denotes the DFTD cell line 06/2887 (T1) (**Table S1A**) and “Nerve” stands  
18 for a healthy nerve biopsy (**Table S1B**). (B) Hierarchical clustering of the 987 differentially  
19 modulated proteins between tumor and healthy biopsies. (C) Box plots of selected protein  
20 abundance across conditions in DFTD cell line (T1) and biopsies of tumor (T), spleen (Sp), skin  
21 (Sk) and nerve tissue (N). (D) Volcano plot of genes with differentially methylated promoters  
22 between healthy and tumor biopsies (hypermethylated in tumor (blue), hypomethylated in tumor  
23 (red)). (E) Box plot of differentially methylated gene promoters for selected genes. (F) Direct  
24 connection proteins network among the 987 tumor modulated proteins, 166 tumor differentially

1 methylated gene promoters and ERBB2 and ERBB3 genes from the drug screen. The direct  
2 network interactions were built with MetaCore based on protein-protein, binding, transcriptional  
3 regulation and phosphorylation interactions. Tumor signature proteins do not have a border,  
4 while methylation candidates are represented with a black border. The ERBB2 candidate from  
5 the drug-screen has a dashed black border. Modulation on tumor versus healthy proteomics  
6 differential analysis, or healthy versus tumor for methylation, is colored from blue (down-  
7 modulated) to red (up-modulated).

8

### 9 **Fig. 3: Molecular dissection of ERBB-STAT3 axis in DFTD**

10 Western blots of (A) total STAT3, pS-STAT3, pY-STAT3 and (B) total ERK1/2 and pT/Y-  
11 ERK1/2 in 4 DFTD cell lines (T1-T4) and fibroblasts (Fib.). (C) Total STAT3, pS-STAT3, pY-  
12 STAT3 and PRX immunohistochemical staining of primary tumor biopsy. (D) 5-point dose-  
13 response curve of cell lines to STAT3-inhibitor (PG-S3-009) with DFTD and fibroblast cell  
14 lines. (E) DFTD cells treated with PG-S3-009 or DMSO as control. 24 hours after treatment  
15 expression of *ERBB2* was measured by real-time PCR. (F) Western blots of total STAT3, pS-  
16 STAT3 and pY-STAT3 upon treatment with the ERBB inhibitors Lapatinib and Sapatinib.

17

### 18 **Fig. 4: Blockade of ERBB induces MHC class I gene expression**

19 (A) DFTD tumor cell line 1 was treated with recombinant interferon  $\gamma$  (rIFN $\gamma$ ) and/or 1  $\mu$ M  
20 Sapatinib. Control cells were treated with solvents. 48 hours after treatment expression of *B2M*,  
21 *MHC-I*, *STAT1* and *STAT3* were measured by real-time PCR. (B) Reciprocal co-  
22 immunoprecipitation of STAT3 and STAT1 followed by Western blots for STAT3 and STAT1  
23 in DFTD tumor cell line (T1), fibroblasts and human HT29 colon cancer cells as control. STAT3



1 respectively STAT1 Western blots are shown upon two exposure times. (C) Tumor volume and  
2 (D) tumor weight of NSG mice transplanted with DFTD tumor cells and treated with either  
3 vehicle or 50 mg/kg Sapitinib daily. (E) Tumor tissue stained for H/E and  
4 immunohistochemically analysed for total STAT3, pS-STAT3, pY-STAT3, Ki67, Cleaved  
5 Caspase 3. (F) Western blots for total STAT3, pY-STAT3, pS-STAT3 and STAT1 from  
6 representative xenograft tumors. (G) Expression of *B2M* and *STAT3* by real-time PCR from  
7 xenograft tumor tissue. Statistical significance was calculated by (A) One-way or (C) Two-way  
8 ANOVA with Bonferroni correction or (D, G) unpaired t-test.

9

10 **Fig. 5: Working model for the impact of the ERBB-STAT3 axis in Devil Facial Tumor**  
11 **Disease (DFTD)**

12 Aggressive social interactions in the highly inbred population of Tasmanian devils enabled the  
13 rapid spread of devil facial tumor disease (DFTD) with fatal consequences. At the molecular  
14 level, this study provides evidence that hyperactivation of the ERBB receptor tyrosine kinases,  
15 possibly through elevated expression levels of ERBB ligands, and its downstream signal  
16 transducer and transcription factor STAT3 are central oncogenic properties of DFTD. STAT3  
17 activates ERBB in a positive feed-forward loop and induces the expression of metastasis genes  
18 such as MMP2 and ZEB2. Further, the hyperactive ERBB-STAT3 axis suppresses the expression  
19 of MHC class I genes, which is expected to contribute to immune evasion and the known lack of  
20 tumor rejection upon horizontal transmission. We hypothesize that high abundance of  
21 phosphorylated STAT3 leads to incorporation of unphosphorylated STAT1 in heterodimers with  
22 STAT3, thereby preventing the transcriptional regulation of STAT1 downstream target genes  
23 such as B2M and MHC class I.

1 **Supplementary Information**

2 **Supplemental Experimental Procedures**

3 **Figures S1-S7**

4 **Tables S1-S7**

5

6

7 **Supplemental Experimental Procedures**

8

9 *Cell culture and tissue biopsies*

10 DFTD cells were grown from primary cell cultures derived from fine needle aspirates that have  
11 been collected from the wild (see **Table S1A**). Devil Facial Tumor cell strains 1-4 were grown in  
12 RPMI (Gibco 21875-034) supplemented with 10% Fetal bovine serum (PAA A15-101), 1% Pen  
13 Strep Glutamine (Gibco 10378-016) and 50  $\mu$ M 2-Mercaptoethanol (Sigma M-3148). Fibroblasts  
14 were grown in Advanced DMEM (Gibco 12491-015) supplemented with 10% Fetal bovine  
15 serum (PAA A15-101), 1% Pen Strep Glutamine (Gibco 10378-016). Cells were grown at 35°C  
16 in 5% CO<sub>2</sub> and lifted with either PBS containing 1 mM EDTA or 0.05% Trypsin-EDTA (Gibco  
17 25300-054). CHO supernatants containing recombinant devil interferon gamma (rIFN $\gamma$ ) was  
18 used 1:3 diluted (Siddle et al., 2013). Control cells received supernatants of wild type CHO cells.  
19 Primary biopsies from Tasmanian devils were obtained from the Department of Primary  
20 Industries, Parks, Water and Environment (DPIPWE) (Tasmanian Government, Australia).  
21 Biopsies were received frozen on dry ice and stored in liquid nitrogen until processed (**Table**  
22 **S1B**).

23

1 *Drug viability screen*

2 We used a combined library of selected 1847 drugs (Sdelci et al., 2016) and 684 kinase inhibitors  
3 (Targetmol catalog no. L1600 and Cayman Chemical item no 10505), which were transferred  
4 onto 384-well plates using an acoustic liquid handler (Echo, Labcyte). 5000 cells per well of  
5 strains 1-4, and 2500 cells per well of fibroblasts were added on top of the drugs (50 nl in  
6 DMSO) with a dispenser (Thermo Fisher Scientific) to a total of 50  $\mu$ l/well. Cell viability was  
7 measured after 72h using the CellTiter-Glo® Luminescent Cell Viability Assay (Promega  
8 G7573) in a multilabel plate reader (EnVision, PerkinElmer). Initially, all drugs were tested on  
9 DFTD cell line #1 at a single dose (typically 10  $\mu$ M). 434 drug hits with effects on cell viability  
10 were subsequently tested in a 4-dose response in triplicate wells of DFTD cell lines 1 to 4 as well  
11 as fibroblasts. Drug candidates were selected based on the difference between the Area Under  
12 the Curve (AUC) of each tumor cell line to the control fibroblast higher than 50. The addition of  
13 2 standard deviations of the mean AUC of each strain should also result in a lower value than the  
14 subtraction of two standard deviations from the fibroblast AUC ( $\text{MeanAUC}_{\text{fibroblasts}} - 2 \text{ Std}$   
15  $\text{DevAUC}_{\text{fibroblasts}} > (\text{MeanAUC}_{\text{tumour strains}} - 2 \text{ Std DevAUC}_{\text{tumour strains}})$ ). This yielded 69 candidates  
16 that killed at least one DFTD cell line. Out of those, 41 drug candidates killed at least three out  
17 of four tumor cell lines but not fibroblasts. These 41 drugs were re-tested as 8-point dose-  
18 response in triplicates on the aforementioned 5 cell lines and cell viability was assessed by  
19 CellTiter-Glo as described previously. The STAT3 inhibitor PG-S3-009 (Garg et al., 2017) was  
20 tested separately as 5-point dose-response curves in triplicates.

21

22 *DNA and RNA isolation*

1 For DNA methylation analysis, approximately 20 mg of primary Tasmanian devil tissue was  
2 isolated and homogenised using the Tissue Lyser II (Qiagen, Hilden, Germany, 12x30sec, 30  
3 Hz). DNA and RNA were isolated using the AllPrep DNA/RNA Mini Kit (Qiagen, 80204),  
4 according to the manufacturer's instructions. For expression analysis from cell lines, total RNA  
5 was isolated from approximately  $1 \times 10^6$  cells using QIAzol lysis reagent according to the  
6 manufacturer's instructions (Qiagen).

7

### 8 *Real-time PCR*

9 Isolated RNA was reverse transcribed into cDNA using the First Strand cDNA Synthesis Kit  
10 (Fermentas) according to the manufacturer's instructions. Subsequent gene expression was then  
11 analysed using SYBR Select Master Mix (Applied Biosystems; 4472908). We designed and used  
12 the following gene-specific primers: 5'-CCCCACAAGACCAAGCGAGGC-3' and 5'-  
13 ACAGCCTGGTATTTCAGCCAACC-3' for *RPL13A* (Siddle et al., 2013), 5'-  
14 GCAGATAGCCAAGGGTATGAGTTACC-3' and 5'-TTTTGCCAGCCCCAAAATCTGT-3'  
15 for *EGFR*, 5'-GGAACCCAAGTGTGCACAGG-3' and 5'-TGGCATCAGCAGGCAGGTA-3'  
16 for *ERBB2*, and 5'-TACATGGTCATGGTTAAGTGCTGG-3' and 5'-  
17 GGTGGATCTCGGGCCATT-3' for *ERBB3*, 5'-CCGTGGGCTACGTGGACGATCAGC-3'  
18 and 5'-GTCGTAGGCGAACTGAAG-3' for *MHC-1* (SAHA-UC; KY194695) (Siddle et al.,  
19 2013), 5'-TGTGCATCCTTCCTACCTGGAGG-3' and 5'-  
20 CATTGTTGAAAGACAGATCGGACCGC-3' for *B2M* (Siddle et al., 2013), 5'-  
21 GGAAAAGCAAGACTGGGACTATGC-3' and 5'-GCGGCTATAGTGCTCATCCAA-3' for  
22 *STAT1*, 5'-GGAAGCTGACCCAGGTAGTGC-3' and 5'-CGGCAGGTCAATGGTATTGC-  
23 3' for *STAT3*. Designed forward primers span exon-exon junctions where possible.

1

## 2 *Western Blotting*

3 Approximately  $5 \times 10^6$  cells from DFTD strains 1-4 and  $2.5 \times 10^6$  Tasmanian devil fibroblasts were  
4 pelleted (260 g, 5 min, 4°C; **Table S1A**), washed three times in cold PBS, snap frozen in liquid  
5 nitrogen and frozen at -80°C until processed. Sample preparation and Western blotting was  
6 performed using standard techniques. Nitrocellulose membranes (0.45 µm Amersham Protran  
7 10600002, GE Healthcare, Buckinghamshire, UK) were incubated with the following antibodies  
8 in the dilution as indicated: specific anti-phospho-STAT3 (Y705) polyclonal rabbit (1:1000;  
9 9131; Cell Signaling Technology, Cambridge, UK), anti-STAT3 monoclonal mouse (1:1000;  
10 610189; BD Biosciences, Franklin Lakes, NJ, USA) or (9139; Cell Signaling; 1:1000), anti-  
11 phospho-STAT3 (S727) polyclonal rabbit (1:1000; 9134; Cell Signaling Technology,  
12 Cambridge, UK), anti-STAT1 (rabbit; 9172; Cell Signaling; 1:1000), anti-phospho-EGFR  
13 (Y1068) monoclonal rabbit (1:1000; 3777; Cell Signaling Technology), anti-EGFR monoclonal  
14 rabbit (1:1000; sc-373746; Santa Cruz, Dallas, TX, USA), anti-phospho-HER2/ERBB2  
15 (Y1221/1222) monoclonal rabbit (1:1000; 2243; Cell Signaling Technology), anti-  
16 HER2/ERBB2 monoclonal rabbit (1:1000; 4290; Cell Signaling Technology), anti-phospho-  
17 HER3/ERBB3 (Y1289) monoclonal rabbit (1:1000; 2842; Cell Signaling Technology), anti-  
18 HER3/ERBB3 monoclonal rabbit (1:1000; 12708; Cell Signaling Technology), anti-HSC70  
19 monoclonal mouse (1:1000; sc-7298; Santa Cruz), anti-ERK1/2 monoclonal rabbit (1:1000;  
20 4695; Cell Signaling Technology, Cambridge, UK), anti-phospho-ERK1/2 (T202/Y204)  
21 monoclonal rabbit (1:1000; 4370; Cell Signaling Technology, Cambridge, UK), anti-pY (4G10;  
22 Merck Millipore; 1:1000), anti-SOCS (1:1000; 3950; Cell Signaling Technology, Cambridge,

1 UK), anti-B2M (1:1000; (*Siddle et al., 2013*)), ECL anti-rabbit IgG (NA934V) or anti-mouse  
2 (NA931) HRP (1:10.000; GE Healthcare, Buckinghamshire, UK).

3

#### 4 *Immunoprecipitation*

5 Cells were lysed in HE buffer (10 mM HEPES (pH 7.35), 1 mM EDTA) supplemented with  
6 protease inhibitors using a dounce tissue grinder. Human HT-29 cells (ATCC HTB-38) served as  
7 control. For immunoprecipitation, 1 mg protein lysate was incubated with 2 µg of anti-STAT3  
8 (9139; Cell Signaling) or anti-STAT1 (9172; Cell Signaling) at 4°C overnight and  
9 immunoprecipitated with 25 µl Dynabeads Protein G (10004D; Thermo Fisher Scientific,  
10 Waltham, MA, USA) for 2 h at 4°C. Beads were washed 3x with HE buffer and samples were  
11 eluated in 40 µl Laemmli buffer at 95°C for 10 min.

12

#### 13 *Histology*

14 DFTD tissues were fixed in 10% neutral buffered formalin and paraffin-embedded. 2 µm FFPE  
15 consecutive tumor sections were stained with Hematoxylin (Merck, Darmstadt, Germany) and  
16 Eosin G (Carl Roth). For immunohistochemical stainings, heat-mediated antigen retrieval was  
17 performed in citrate buffer at pH 6.0 (S1699; Dako, Agilent, Santa Clara, CA, USA), EDTA at  
18 pH 8.0 or TE at pH 9.0. Sections were stained with antibodies specific to STAT3 (1:200; pH 6;  
19 9139; Cell Signaling Technology), phospho-STAT3 (S727) monoclonal rabbit (1:80; pH 9;  
20 9134; Cell Signaling Technology); EGFR monoclonal mouse (1:300; 610016; pH 9; BD  
21 Biosciences), HER2/ERBB2 monoclonal rabbit (1:200, 4290; Cell Signaling Technology),  
22 HER3/ERBB3 monoclonal rabbit (1:200, 12708; Cell Signaling Technology), Periaxin/PRX  
23 (1:200, HPA001868, Sigma Aldrich), Ki67 (NCL-Ki67p; Novocastra, Leica Biosystems;

1 1:1000) or Cleaved Caspase 3 (Asp175) (9661S, Cell Signaling Technology, 1:200) using  
2 standard protocols.

3

#### 4 *Mass-spectrometry based proteomics*

5 Sample Preparation for MS: Approximately  $1 \times 10^7$  cells from DFT1 strain 1 were pelleted (260g,  
6 5 min, 4°C), washed three times in PBS and frozen at -80°C until processed. Primary biopsies  
7 were thawed and placed in a petri dish. Using a scalpel blade, 5×5 to 5×8 mm pieces of tissue  
8 were excised from the solid mass and placed in a 2 ml Eppendorf tube. Depending on the size of  
9 the piece of tissue, 500-1000 µl of lysis buffer (50 mM HEPES, pH 8.0, 2% SDS, 1 mM PMSF,  
10 and protease inhibitor cocktail (Sigma-Aldrich)) was added to the tumour and skin samples.  
11 Samples were homogenised using the Tissue Lyser II (Qiagen, Hilden, Germany) for 4×2 min,  
12 30 Hz. For some samples, it was necessary to repeat the homogenization procedure. Spleen  
13 samples were pre-cleared of blood before tissue lysis. Tissue pieces were placed in a 2 ml  
14 Eppendorf tube containing 1 mL red blood cell (RBC)-lysis buffer (eBioscience, San Diego,  
15 USA). Spleen tissue was homogenised using the ‘Tissue Lyser II’ (Qiagen, Hilden, Germany) for  
16 3×30s, centrifuged at 20000 g for 10 min and supernatant containing the lysed red blood cells  
17 removed. Lysis was performed at room temperature (RT) for 20 min. Lysed samples were heated  
18 at 99°C for 5 min and then cooled to RT. The cell lysate was sonicated using a Covaris S2 high  
19 performance ultrasonicator (Covaris Inc., Brighton, UK. The lysate was centrifuged at 20000 g  
20 for 15 min at 20°C, and the protein extract was collected from the supernatant. Total protein  
21 content of the whole tissue lysates was determined using the BCA protein assay kit (Pierce  
22 Biotechnology, Rockford, IL) following the recommendations of the manufacturer. The assay  
23 was performed in a 96-well plate using 10 µl of each lysate and standard protein. The samples

1 were measured in triplicates. Bovine serum albumin (BSA) (Pierce Biotechnology, Rockford, IL)  
2 was used as the standard protein.

3 Filter-Aided Sample Preparation (FASP): 100  $\mu\text{g}$  total protein per tissue was used for FASP  
4 digestion. Dithiothreitol (DTT; SIGMA-Aldrich Chemie, Vienna, Austria) was added to sample  
5 to a final concentration of approx. 83 mM. After incubation of the samples at 99°C for 5 min,  
6 FASP digestion was performed using a 30 kDa molecular weight cut-off filter (Microcon-30,  
7 Ultracel YM-30, Merck-Millipore Co., Cork, IRL) (Wisniewski et al., 2009). Briefly, 200  $\mu\text{L}$  8  
8 M urea in 100 mM Tris-HCl (pH 8.5) (UA) was added to the samples. If the volume exceeded 50  
9  $\mu\text{l}$ , then 400  $\mu\text{l}$  UA was added. After equilibration of the filter units with 200  $\mu\text{l}$  UA and  
10 centrifugation at 14000 $\times g$  for 15 min, the lysed samples were applied in steps of 250  $\mu\text{l}$  to the  
11 filter unit and centrifuged at 14000  $g$  for 15 min at 20°C to remove SDS. Any remaining SDS  
12 was exchanged by urea in a second washing step with 200  $\mu\text{l}$  UA. The proteins were alkylated  
13 with 100  $\mu\text{l}$  50 mM iodoacetamide (Sigma-Aldrich Chemie, Vienna, Austria) for 30 min at RT.  
14 Afterwards, three washing steps with 100  $\mu\text{L}$  UA solution were performed, followed by three  
15 washing steps with 100  $\mu\text{L}$  50 mM TEAB buffer (Sigma-Aldrich, Vienna, Austria). Proteins  
16 were digested with Trypsin overnight at 37°C. Peptides were recovered using 40  $\mu\text{l}$  50 mM  
17 TEAB buffer followed by 50  $\mu\text{l}$  of 0.5 M NaCl (Sigma-Aldrich, Vienna, Austria).

18 Two-dimensional liquid chromatography was performed by reverse-phase chromatography at  
19 high and low pH. FASP digests were purified by solid-phase extraction (SPE) (MacroSpin  
20 Columns, 30-300  $\mu\text{g}$  capacity, Nest Group Inc. Southboro, MA, USA) and reconstituted in 23  $\mu\text{l}$   
21 5% acetonitrile, 10 mM ammonium formate. Peptides were separated on a Gemini-NX C18 (150  
22  $\times$  2 mm, 3  $\mu\text{m}$ , 110  $\text{\AA}$ , Phenomenex, Torrance, US) using a 30 min gradient from 5 to 90%  
23 acetonitrile containing 10 mM ammonium formate buffer, pH 10, at a flow rate of 100  $\mu\text{L}/\text{min}$ ,



1 using an Agilent 1200 HPLC system (Agilent Biotechnologies, Palo Alto, CA). Details of the  
2 methodology are as described previously (Bennett et al., 2011). Ten time-based fractions were  
3 collected. Samples were acidified by the addition of 5  $\mu$ l 5% formic acid. Solvent was removed  
4 in a vacuum concentrator, and samples were reconstituted in 5% formic acid. Liquid  
5 chromatography mass spectrometry was performed on a hybrid linear trap quadrupole (LTQ)  
6 Orbitrap Velos mass spectrometer (ThermoFisher Scientific, Waltham, MA) using the *Xcalibur*  
7 *version 2.1.0* coupled to an Agilent 1200 HPLC nanoflow system (dual pump system with one  
8 trap-column and one analytical column) via a nanoelectrospray ion source using liquid junction  
9 (Proxeon, Odense, Denmark). Solvents for HPLC separation of peptides were as follows: solvent  
10 A consisted of 0.4% formic acid (FA) in water, and solvent B consisted of 0.4% FA in 70%  
11 methanol and 20% 2-propanol. From a thermostatted microautosampler, 8  $\mu$ l of the tryptic  
12 peptide mixture were automatically loaded onto a trap column (Zorbax 300SB-C18 5  $\mu$ m, 5 $\times$ 0.3  
13 mm, Agilent Biotechnologies) with a binary pump at a flow rate of 45  $\mu$ l/min. 0.1% trifluoroacetic  
14 acid (TFA) was used for loading and washing the precolumn. After washing, the peptides were  
15 eluted by back-flushing onto a 16 cm fused silica analytical column with an inner diameter of 50  
16  $\mu$ m packed with C18 reversed phase material (ReproSil-Pur120 C18-AQ, 3  $\mu$ m, Dr. Maisch  
17 GmbH, Ammerbuch-Entringen, Germany). The peptides were eluted from the analytical column  
18 with a 27 min gradient ranging from 3% to 30% solvent B, followed by a 25 min gradient from  
19 30% to 70% solvent B, and finally a 7 min gradient from 70% to 100% solvent B at a constant  
20 flow rate of 100 nl/min (Bennett et al., 2011). The analyses were performed in a data-dependent  
21 acquisition mode, and dynamic exclusion for selected ions was 60s. A top 15 collision-induced  
22 dissociation (CID) method was used, and a single lock mass at  $m/z$  445.120024 ( $\text{Si}(\text{CH}_3)_2\text{O})_6$   
23 was employed (Olsen et al., 2005). Maximal ion accumulation time allowed in CID mode was 50

1 ms for MS<sub>n</sub> in the LTQ and 500 ms in the C-trap. Automatic gain control (AGC) was used to  
2 prevent overfilling of the ion traps and was set to 5,000 in MS<sup>2</sup> mode for the LTQ and 10<sup>6</sup> ions  
3 for a full MS<sup>1</sup> FTMS scan. Intact peptides were detected in the Orbitrap Velos at a resolution of  
4 60,000 resolution (at *m/z* 400). The threshold for switching from MS<sup>1</sup> to MS<sup>2</sup> was 2,000 counts.  
5 The data were analyzed using Proteome Discoverer version 2.2 against the Uniprot Tasmanian  
6 Devil fasta database version 2016.11 including isoforms obtained by VARSPLIC (Kersey et al.,  
7 2000) and appended with known contaminants (91064 sequences total). The precursor masses  
8 were first recalibrated using the recalibration node (parameters: precursor mass tolerance: 20  
9 ppm, fragment mass tolerance 0.5 Da, Carbamidomethylation of cysteine as static modification).  
10 The recalibrated data were then searched using Sequest HT (Eng et al., 1994) and Mascot  
11 (v2.3.02, MatrixScience, London, U.K.) (Perkins et al., 1999) search engines with precursor  
12 mass tolerance being 4 ppm, fragment ion tolerance was 0.3 Da, methionine oxidation used as  
13 dynamic modification, and carbamidomethylation of cysteine as static modification in both  
14 search engines. Moreover protein N-terminal acetylation was considered as dynamic  
15 modification in Sequest HT. Minimum length of peptides was set to 6 and maximum number of  
16 missed cleavages was set to two in Sequest HT and to one in Mascot. Percolator (Kall et al.,  
17 2007) was used to filter peptide-spectra matches (PSMs) at 1% false discovery rate (FDR) and  
18 QUALITY (Kall et al., 2009) to filter identified peptides at 1% FDR. Identified proteins were  
19 also filtered at 1% FDR by considering sum of negative logarithm of posterior error probabilities  
20 of connected PSMs. Matches against reversed fasta database were used to estimate FDR at PSM,  
21 peptide, and protein level. Abundance of proteins was quantified using the Minora feature  
22 detection node and integrating area under the MS1 chromatogram.

1 Principal component analysis was performed on 3894 out of 6672 proteins quantified in all 19  
2 samples. We further focused on 4981/6672 proteins quantified in at least 80% of the samples.  
3 The protein abundance data was normalized by variance stabilizing transformation (Huber et al.,  
4 2002). Missing values are imputed on normalized abundance values with the k Nearest  
5 Neighbors (kNN) algorithm implemented in the R Bioconductor package impute (Hastie et al.,  
6 2017).

7 For each protein with a missing abundance in any of the samples, the kNN algorithm identifies  
8 the set of 10 most similar proteins based on non-missing abundance values. Missing abundance  
9 is then imputed as an average abundance in that set. An average of the signal is then performed  
10 on the k closest neighbours. Differential analysis, tumor versus the healthy, was performed  
11 between biopsies (excluding the tumor cell line) using the limma Bioconductor package (Ritchie  
12 et al., 2015). Proteins were considered as differentially modulated if their adjusted p-value was  
13  $\leq 0.05$  and their absolute log<sub>2</sub> Fold Change was  $\geq 1$  between tumor and healthy biopsies.  
14 Hierarchical clustering of the 987 differentially modulated proteins was performed with  
15 Pearson's distance measure and the average clustering method.

16

### 17 *DNA methylation analysis*

18 DNA methylation profiling by RRBS was performed as described previously using 100 ng of  
19 genomic DNA isolated from RNA-later preserved tissue samples through the Allprep DNA/RNA  
20 Mini kit (QIAGEN) (Klughammer et al., 2015). Methylated and unmethylated spike-in controls  
21 were added in a concentration of 0.1% to assess bisulfite conversion efficiency independent of  
22 CpG context. DNA was digested using the restriction enzymes MspI and TaqI in combination (as  
23 opposed to only MspI in the original protocol) in order to increase genome-wide coverage.

1 Restriction enzyme digestion was followed by fragment end repair, A-tailing, and adapter  
2 ligation. The amount of effective library was determined by qPCR, and samples were  
3 multiplexed in pools of 13 with similar qPCR  $C_t$  values. The pools were then subjected to  
4 bisulfite conversion followed by library enrichment by PCR. Enrichment cycles were determined  
5 using qPCR and ranged from 9 to 13 (median: 11). After confirming adequate fragment size  
6 distributions on Bioanalyzer High Sensitivity DNA chips (Agilent), libraries were sequenced on  
7 Illumina HiSeq 3000/4000 machines in a 50 bp single-read setup.

8 The DNA methylation (RRBS) data were analyzed using the RefFreeDMA pipeline as described  
9 previously to avoid potential biases in read mapping and methylation calling related to the  
10 scaffold assembly status of the published Tasmanian Devil reference genome sarHar1  
11 (Klughammer et al., 2015). In brief, a custom *ad-hoc* reference genome was deduced directly  
12 from the RRBS sequencing reads and used for read mapping and methylation calling. Based on  
13 the thus produced DNA methylation profiles, differential DNA methylation analysis was  
14 performed as part of the RefFreeDMA pipeline and as originally described in (Assenov et al.,  
15 2014). Gene annotations were transferred by mapping the deduced genome fragments to the  
16 published scaffold-level Tasmanian Devil genome sarHar1, downloaded from the UCSC genome  
17 browser. A gene annotation file was produced by joining the UCSC transcript annotation file  
18 with the Ensembl v86 transcript annotation file of sarHar1 based on the common Ensembl  
19 transcript identifiers. Gene promoters were defined as the region between 5000 bases  
20 downstream and 2500 bases upstream of the transcription start site. 487540 (11.37%) of the  
21 individual CpGs are situated in promoters of annotated genes. For promoter methylation analysis  
22 we focused on a total of 69754 CpGs that are also covered in at least 80% of the samples. The  
23 significance of differential methylation throughout promoters or deduced genome fragments was

1 assessed by combining the p-values for single CpGs within the respective promoter regions or  
2 deduced genome fragments using an extension of the Fisher's method as described previously  
3 (Assenov et al., 2014; Klughammer et al., 2015).

4

#### 5 *Network analysis*

6 We performed Transcription Factor and Pathway Maps enrichment on the differentially  
7 modulated entities (proteins, genes) with the MetaCore™ (Thomson Reuters, version 6.32 build  
8 69020; cutoff for p-value of enrichment 0.05). The results are reported based on the z-score of  
9 enrichment. The 987 differentially modulated proteins were integrated together with the 166  
10 genes with differentially modulated promoters and the candidate genes ERBB2 and ERBB3 from  
11 the drug-screen at the level of MetaCore interactions. Only high-confidence direct interactions  
12 between pairs of genes are considered: protein binding, transcription factor regulation, other  
13 functional interaction. 632 of the previous candidates form a direct network connection.

14

#### 15 *Transcriptome expression analysis and variant calling*

16 The amount of total RNA was quantified using Qubit 2.0 Fluorometric Quantitation system (Life  
17 Technologies) and the RNA integrity number (RIN) was determined using Experion Automated  
18 Electrophoresis System (Bio-Rad). RNA-seq libraries were prepared with TruSeq Stranded  
19 mRNA LT sample preparation kit (Illumina) using Sciclone and Zephyr liquid handling robotics  
20 (PerkinElmer). Library amount was quantified using Qubit 2.0 Fluorometric Quantitation system  
21 (Life Technologies) and the size distribution was assessed using Experion Automated  
22 Electrophoresis System (Bio-Rad). For sequencing 6 libraries were pooled, diluted and  
23 sequenced on Illumina HiSeq 3000/4000 using 75 bp paired-end chemistry. Base calls provided

1 by the Illumina Realtime Analysis software were converted into BAM format using  
2 Illumina2bam and demultiplexed using BamIndexDecoder ([https://github.com/wtsi-](https://github.com/wtsi-npg/illumina2bam)  
3 [npg/illumina2bam](https://github.com/wtsi-npg/illumina2bam)). Paired-end reads were trimmed for adaptor sequences and filtered with the  
4 trimmomatic tool (Bolger et al., 2014). Trimmed reads were aligned on the version 7.0 of the  
5 Tasmanian Devil with the STAR aligner (Dobin et al., 2013). Counting of reads on annotated  
6 transcripts (Sarcophilus\_harrisii.DEVIL7.0.90.gtf from Ensembl) was performed with HTSeq  
7 (Anders et al., 2015). The DESeq2 Biconductor library has been used for counts normalization  
8 and differential analysis between the transcriptomes of the four DFTD and fibroblast cell lines  
9 (Love et al., 2014). Differentially expressed genes were identified based on the following  
10 cutoffs: an average minimum expression value between conditions of 50 reads, an absolute log  
11 fold change of 1, and an adjusted p-value of maximum 0.05. The pipeline for variant calling is  
12 based on the GATK version 3.7, following the best-practices (Van der Auwera et al., 2013).  
13 Called variants were annotated with SNPEff v4.2 (Cingolani et al., 2012). Variants are filtered  
14 on strand bias ( $<30$ ), quality ( $QD > 2$ ), coverage ( $DP \geq 10$ ) and allele frequency ( $AF = 0.5$ ).

15

### 16 *Mouse xenograft studies*

17 NOD scid gamma (NSG) mice were maintained under pathogen-free conditions at the University  
18 of Veterinary Medicine, Vienna. Mice were at the age of 8-14 weeks at the time of cell  
19 implantation. All animal experiments were carried out according to the animal license protocol  
20 (BMWFV-68.205/0130-WF/V/3b/2016) approved by the Austrian Ministry BMWF authorities.  
21 The experimental design and number of mice assigned to each treatment arm were based on prior  
22 experience with similar models and provided sufficient statistical power to discern significant

1 differences. Mice were matched according to initial tumor size and randomized to treatment with  
2 Sunitinib or vehicle (ddH<sub>2</sub>O + 1% Tween80). No mice were excluded from the analysis.  
3 Mice were implanted subcutaneously in both flanks with 1x10<sup>6</sup> Devil Facial Tumor cell line 1  
4 (**Table S1A**) in 100 µl PBS, using a 27G needle. Tumor growth was measured twice a week  
5 using Vernier calipers for the duration of the experiment and tumor volumes were calculated  
6 with the following formula: tumor volume = (length × width<sup>2</sup>)/2. Treatment was initiated when  
7 the average tumor volume reached approximately 100 mm<sup>3</sup> and experiments were terminated  
8 once tumor volume reached 1 cm<sup>3</sup>. The animals were randomly divided into two groups and  
9 treated daily with Sunitinib (50 mg/kg) or vehicle (ddH<sub>2</sub>O + 1% Tween80) until terminal  
10 workup. After termination of the experiment, tumors were resected and used for analysis of  
11 tumor weight, immunohistochemistry, real-time PCR and immunoblotting as described.

12

### 13 *Measurement of biochemistry parameters*

14 Serum was prepared by centrifugation of the whole blood for 20 min at 7000 rpm. Serum  
15 concentration of alanine aminotransferase, aspartate aminotransferase and blood urea nitrogen  
16 was measured using a chemistry analyzer (IDEXX VetTest 8008, IDEXX GmbH, Ludwigsburg,  
17 Germany).

18

## 1 **Figure S1: Proteomic analysis**

2 (A) Number of quantified proteins for each sample. Individual Tasmanian devils are named  
3 according to their geographical sampling locations. “Cell line” denotes the DFTD cell line  
4 06/2887 (Table S1A, also labeled as T1 throughout the study) and “Nerve” stands for a healthy  
5 nerve biopsy (Table S1B). (B) Cumulative frequency distribution of the percentage missing  
6 (non-quantified) protein abundance across the samples. We focus on proteins quantified in at  
7 least 80% of the samples (less than 20% missing values). This represents 4981/6672 proteins,  
8 almost 75% of the total identified proteins. (C) Hierarchical clustering of missing values (0-blue  
9 values) across samples. Missing values are not specific to one sample or condition but are  
10 distributed across all samples. (D) Volcano plot of the 4981 proteins on which we performed  
11 differential analysis. (E) Top 15 enriched transcription factors (TF) and STAT3 for the  
12 differentially modulated proteins: tumor versus healthy samples. The enrichment was performed  
13 with MetaCore™ (Thomson Reuters, version 6.32 build 69020) and the reported TF have all p-  
14 values  $\leq 0.05$  and are ordered according to their z-score of enrichment. STAT3 is the most  
15 enriched TF that is itself differentially modulated in the proteomics dataset. (F) Proteins directly  
16 connected to and downstream of STAT3 (based on MetaCore database). Red proteins are more  
17 abundant in tumors compared to healthy biopsies, while blue stands for reduced protein in  
18 tumors. Proteins are ordered vertically according to how many connections they have inside the  
19 STAT3 downstream network, from the most connected (UP) to the least connected (DOWN).

20

## 21 **Figure S2: Global DNA methylation analysis**

22 (A) Coverage histogram across the individual CpGs (4,286,156). CpGs covered by at least 8 and  
23 at most 200 reads are considered for further analysis. Coverage lower than 8 reads was deemed  
24 insufficient for computing accurate DNA methylation levels. Furthermore, sites covered by more



1 than 200 reads might harbor unreliable measurements introduced by excessive amplification or  
2 repetitive sequences. **(B)** Cumulative frequency distribution of the percentage of not detected  
3 CpGs across the samples. 572018 (13.35%) of CpGs are detected in at least 80% of samples (15  
4 out of 19). **(C)** Healthy versus Tumor volcano plot of individual detected CpGs in more than  
5 80% of the samples (572018 CpGs). The differential analysis of healthy versus tumor samples  
6 (cell line excluded) revealed a total of 2744 tumor hypermethylated and 5430 tumor  
7 hypomethylated CpGs (absolute log Fold-change  $\geq 1$ , adjusted p-value  $\leq 0.05$ ). **(D)** AME  
8 motif enrichment in fragments hypomethylated or hypermethylated in tumor samples compared  
9 to healthy tissues, red and blue respectively. The top 2 enriched motifs (sorted according to the  
10 adjusted p-value of enrichment) are shown for each class of CpGs. **(E)** Characterizing individual  
11 CpGs: detected, annotated. 97 205 individual CpGs are detected in at least 80% of the samples  
12 and localized in the promoters of annotated genes (from -5 kb to 2.5 kb around the TSS). **(F)**  
13 Density distribution of the CpG distance to the Transcription Start Site (TSS) of annotated genes.  
14 **(G)** Principal component analysis on the promoter averaged CpGs across the 19 samples.  
15 Samples separate mainly on the tumor versus healthy profiles (PC1 – 33.5% of the variability),  
16 with spleen versus skin differences driving the PC2 (11.99% of the variability). Sampling  
17 locations are indicated in capital letters (C Cradle Mountain, K Kempton, N Narawntapu, W  
18 Wisedale). **(H)** Top 15 enriched transcription factors (TF) for the differentially methylated gene  
19 promoters: healthy versus tumor samples. The enrichment was performed with MetaCore and the  
20 reported TF have all p-values  $\leq 0.05$  and are ordered according to their z-score of enrichment.  
21 **(I)** Comparison of the proteomics and methylation hits. Log fold-change of tumor versus healthy  
22 analysis was compared to the log fold-change of promoter averaged CpGs healthy versus tumor.  
23 2239 entities were detected in both analyses. Yellow, orange and green circles stand for entities

1 found as differentially modulated only in proteomics, only in methylation or in both,  
2 respectively. **(J)** Integrative Genomics Viewer plots of promoter CpG methylation across  
3 samples for ESR1 and GATA3. Red stands for methylated, while blue stands for un-methylated.

4

### 5 **Figure S3: Protein tyrosine phosphorylation**

6 Total protein phosphorylation immunoblots from lysates of 4 DFTD cell lines (T1-T4) and  
7 fibroblasts (Fib.) using a global anti-pY monoclonal antibody (4G10) in different input amounts.

8

### 9 **Figure S4: RNA-seq analysis**

10 **(A)** Number of reads across 4 DFTD cell lines (T1-T4) and fibroblasts (Fib.). Total number of  
11 reads, reads passing the quality filters (good reads), reads mapping at unique positions on the  
12 genome and reads mapping on annotated genes are reported. More than 50 million reads were  
13 produced for each sample. While more than 90% of the good reads map to unique positions on  
14 the genome, only between 13 and 34% of these are also mapping to annotated transcripts. **(B)**  
15 Volcano plot of the differentially expressed genes between the four DFTD and the fibroblast cell  
16 lines. 2577 genes are down-regulated (blue), and 2079 genes are up-regulated (red). **(C)**  
17 MetaCore Transcription Factor enrichment analysis. Enrichments analysis has been performed  
18 separately on the genes UP and DOWN modulated in the DFTD cells compared to fibroblasts.  
19 Transcription factors that are themselves modulated in our dataset are reported in bold and their  
20 bars colored in red or blue, for up and respectively down modulated. All transcription factors  
21 with a reported bar have significant enrichment p-values ( $\leq 0.05$ ). SOX10 that is highly  
22 expressed in the tumor cell lines and enriched exclusively for up-regulated genes is a  
23 transcription factor critical for Schwann cell development. Other enriched factors, like STAT3

1 are more abundant in the DFTD cell lines while, ESR1 is not expressed in the tumor cell lines.  
2 **(D)** Annotation classes of variant effects across the five cell lines. The vast majority of variants  
3 are localized in intergenic, downstream or intronic regions. **(E)** Transitions and transversions  
4 distribution of single nucleotide variants (SNVs) across samples. All the five samples are  
5 enriched for transitions across all or only missense SNVs. **(F)** Venn diagram of missense variants  
6 shared or specific of the tumor strains and absent from fibroblasts. 38% (163 out of 444 variants)  
7 are shared across the 4 strains.

8

9 **Figure S5: Upregulated regulators and ERBB ligands in DFTD tumor cells.**

10 **(A)** Heatmap of RNAseq expression for positive (*ERBIN*, *CPNE3*) and negative (*EREG*,  
11 *PTPNI2*) regulators of the ERBB pathway and ERBB ligands in 4 DFTD cell lines (T1-T4) and  
12 fibroblasts (Fib.). **(B)** Western blot for EGFL8 from DFTD cell lines and Tasmanian devil  
13 fibroblasts. **(C)** RNAseq-derived expression values of *SOCS1* from DFTD cell lines and  
14 Tasmanian devil fibroblasts. **(D)** Western blot for SOCS1 from DFTD cell lines and Tasmanian  
15 devil fibroblasts.

16

17 **Figure S6: Effects of recombinant interferon gamma and Sapitinib**

18 Western blots for pY-STAT1, STAT1, pY-STAT3, STAT3 and B2M from DFTD cell line (T1)  
19 upon treatment with rIFN $\gamma$ , Sapitinib or rIFN $\gamma$  and Sapitinib for 6 hours.

20

21 **Figure S7: Pathologic examination of xenograft mouse model**

22 Serum concentration of **(A)** alanine aminotransferase, **(B)** aspartate aminotransferase and **(C)**  
23 blood urea nitrogen from mice treated with either vehicle or 50 mg/kg Sapitinib daily for 13

1 days. Bars are representative of 3 to 5 mice. **(D)** H&E stainings for liver, lung, kidney and nerve  
2 tissue of mice treated with either vehicle or 50 mg/kg Sapitinib daily for 13 days. Nerve tissue  
3 was also immunohistochemically stained for Periaxin (PRX).

4

5

6 **Table S1: Description of cell lines and sample biopsies used in this study**

7 Description of **(A)** cell lines and **(B)** biopsies of Tasmanian devils used in this study

8

9 **Table S2: List of drug hits**

10 Drug hits of **(A)** 4-point and **(B)** 8-point dose titration pharmacological screening rounds.

11

12 **Table S3: List of antibodies used in this study**

13

14 **Table S4: Mass-spectrometry based proteomics**

15 **(A)** List of unique proteins identified by mass-spectrometry and differential analysis. **(B)**  
16 Pathway enrichment analysis with MetaCore. **(C)** STAT3 downstream regulated proteins and  
17 their respective interactions (MetaCore).

18

19 **Table S5: Differential analysis of DNA methylation**

20

21 **Table S6: Variant calling analysis**

22

23 **Table S7: Differential expression analysis of RNA sequencing data**

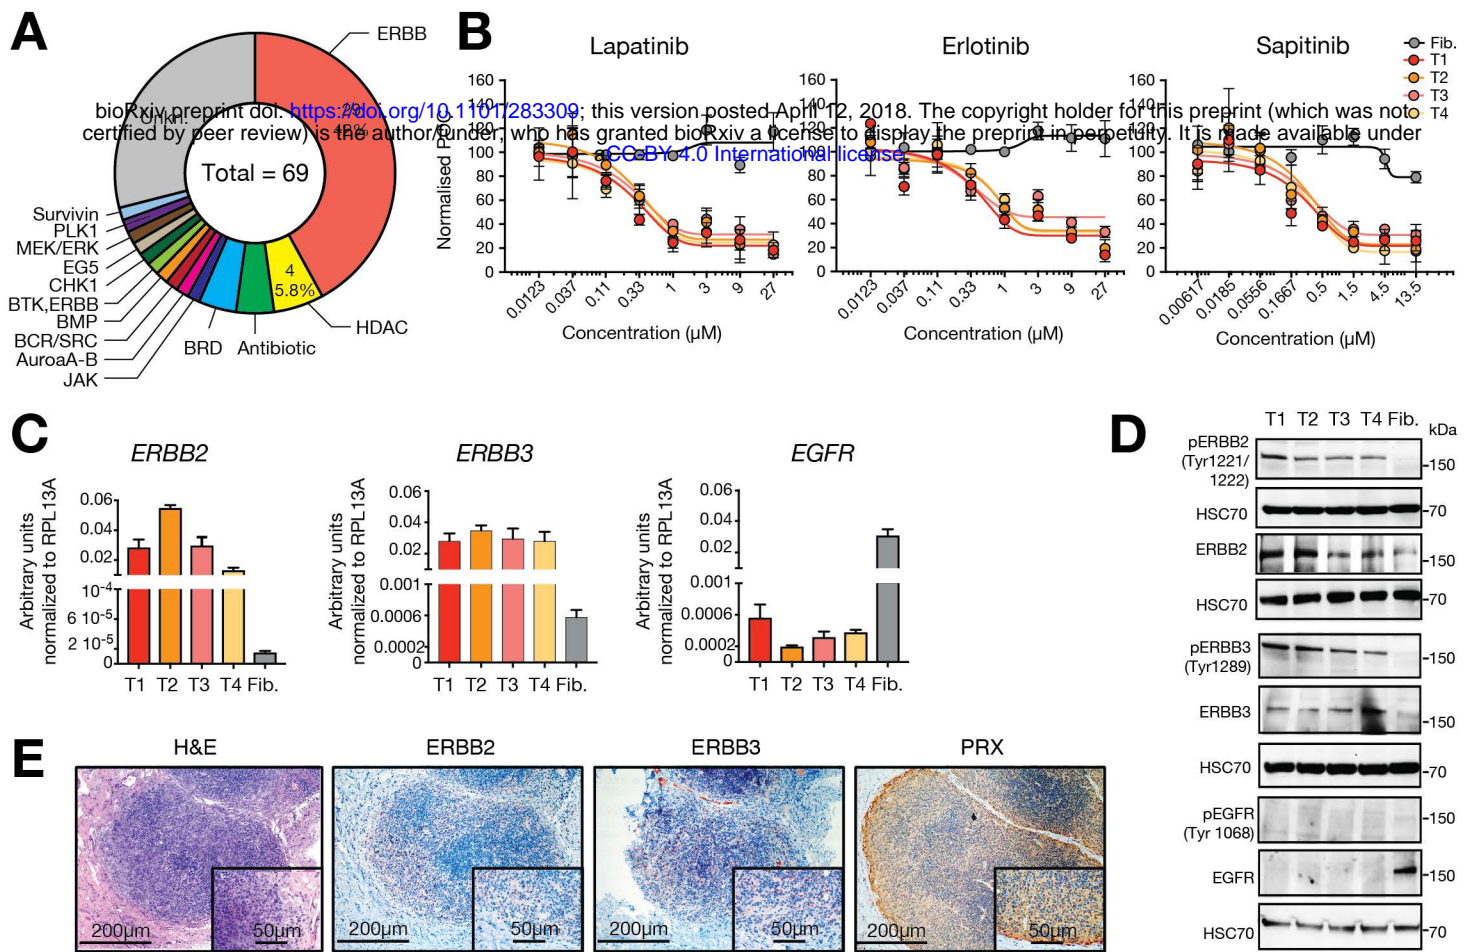

**Figure 1**



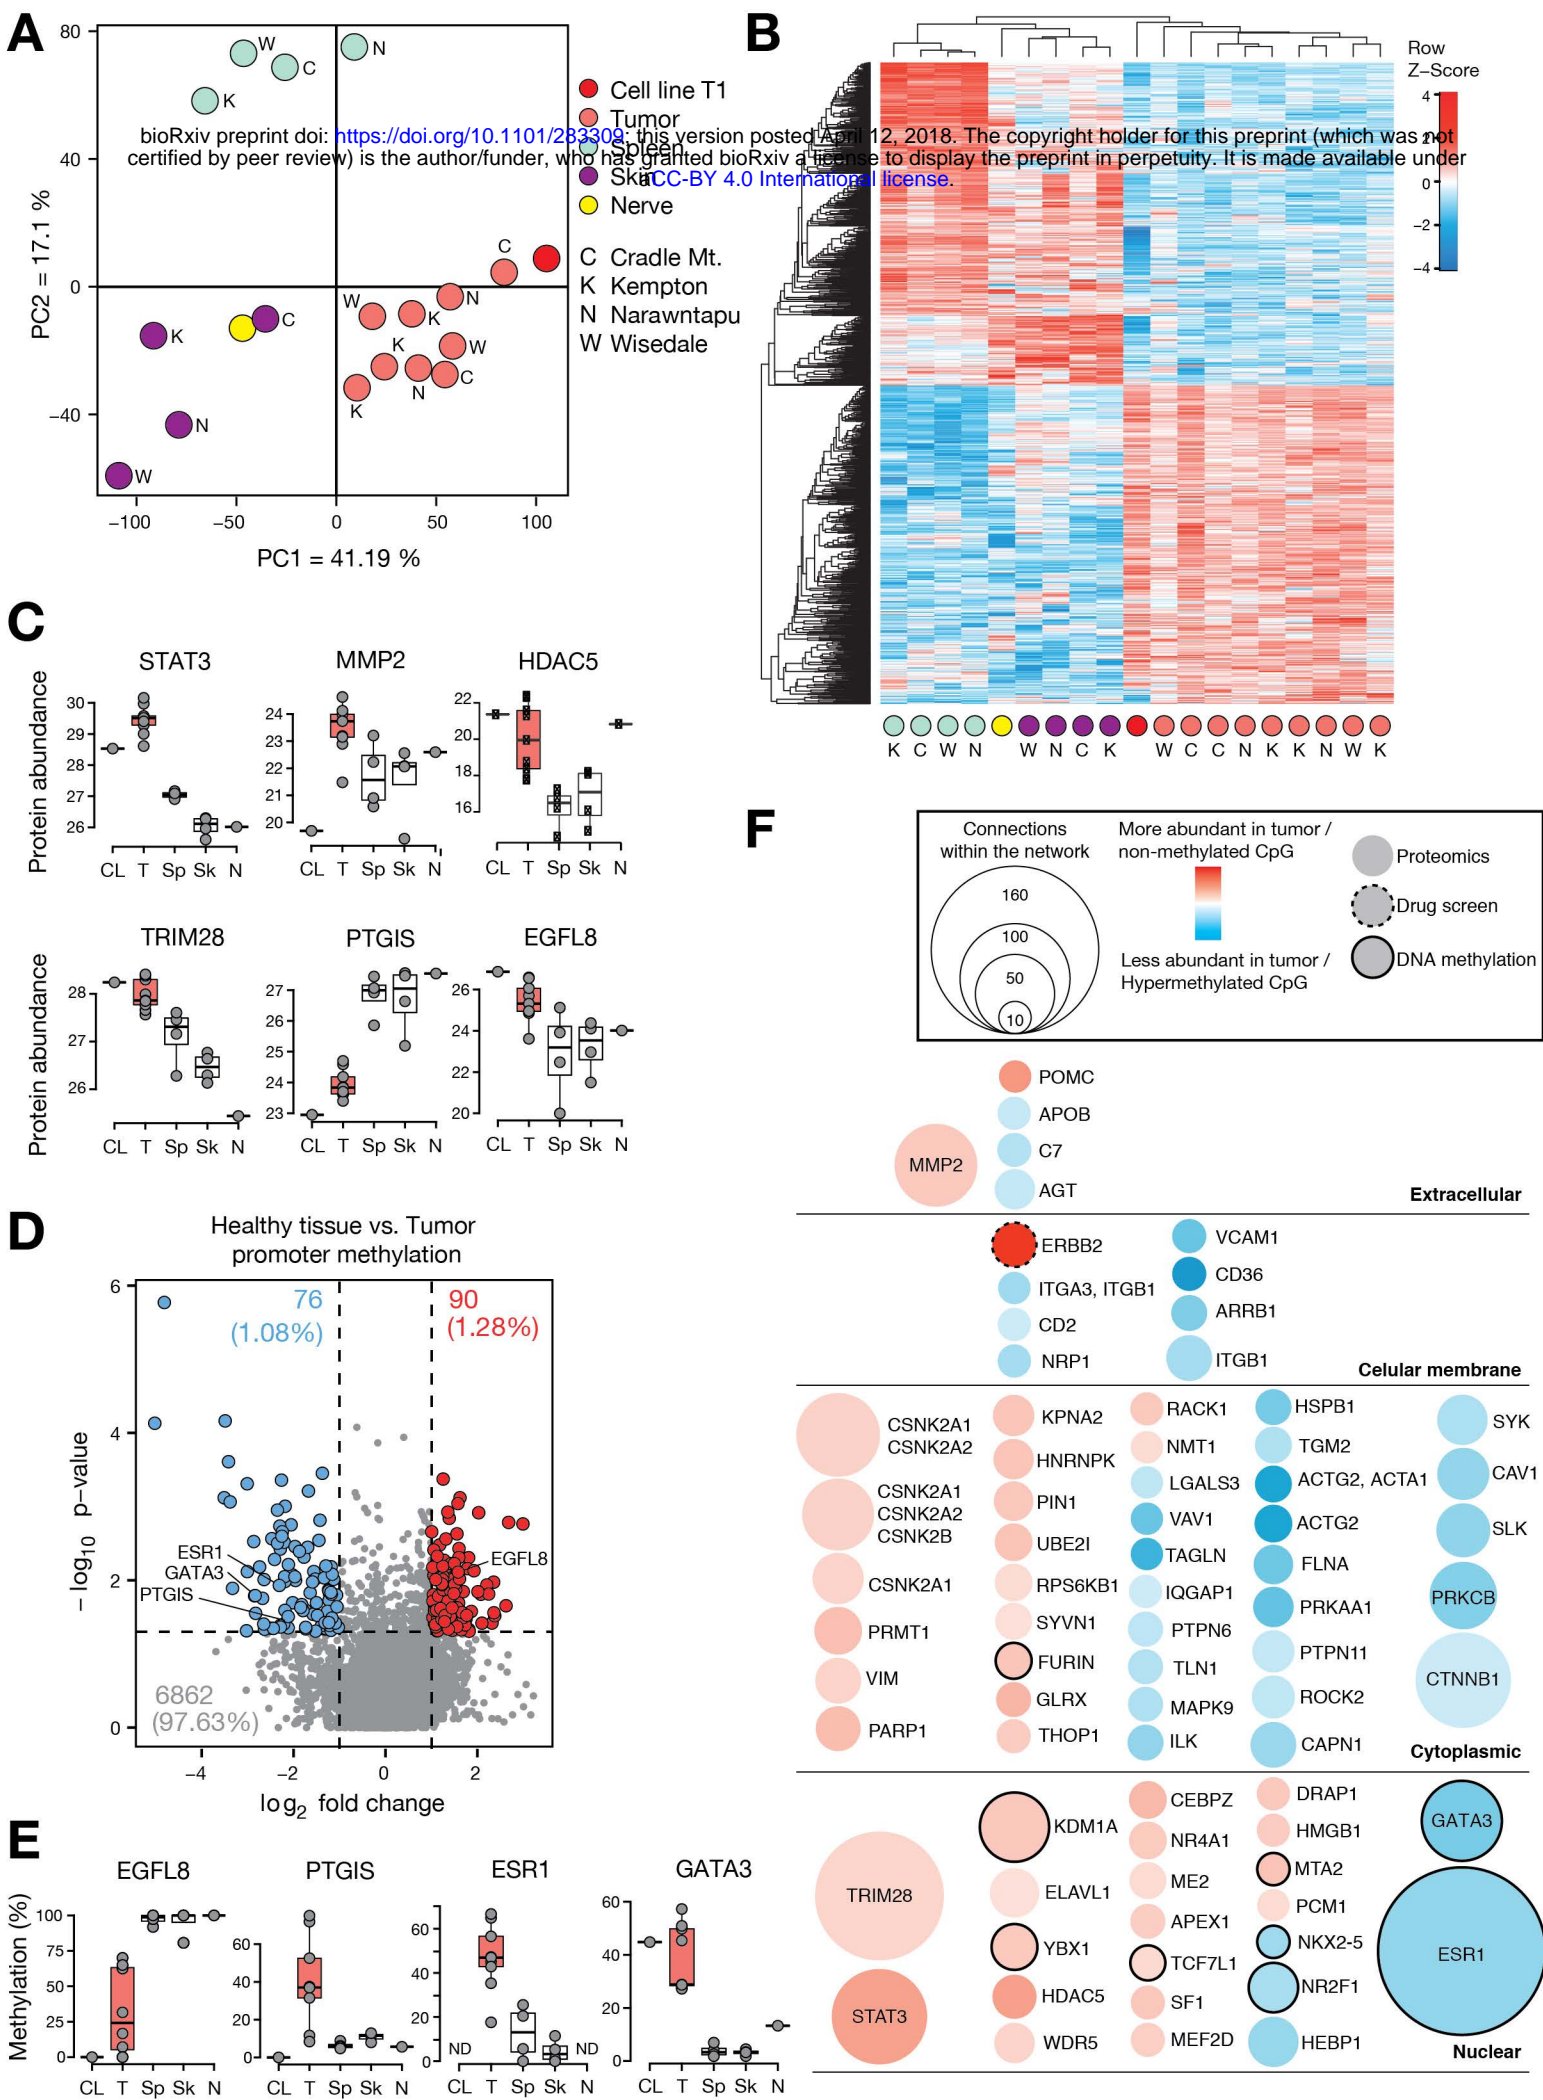

**Figure 2**

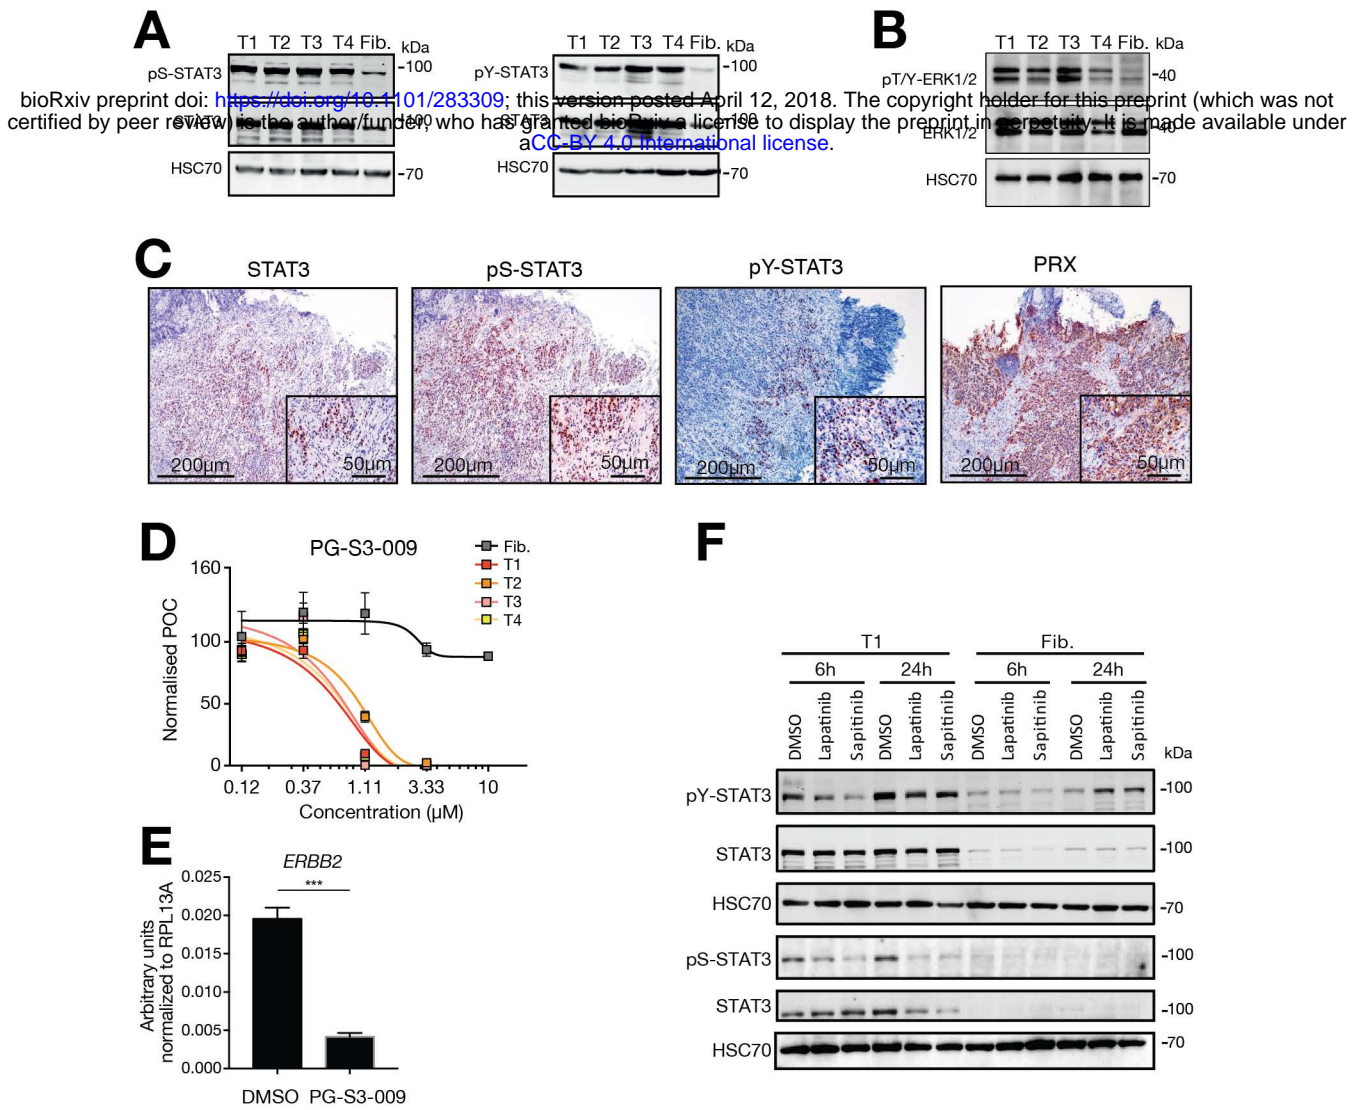

**Figure 3**



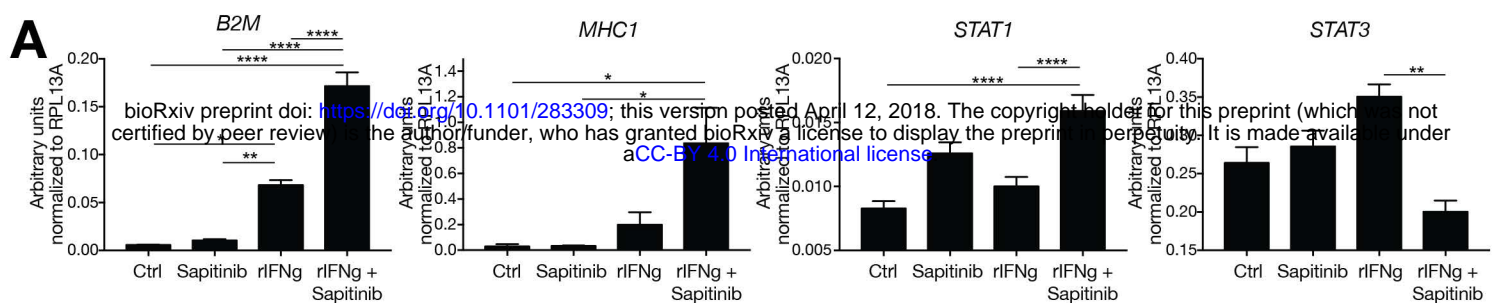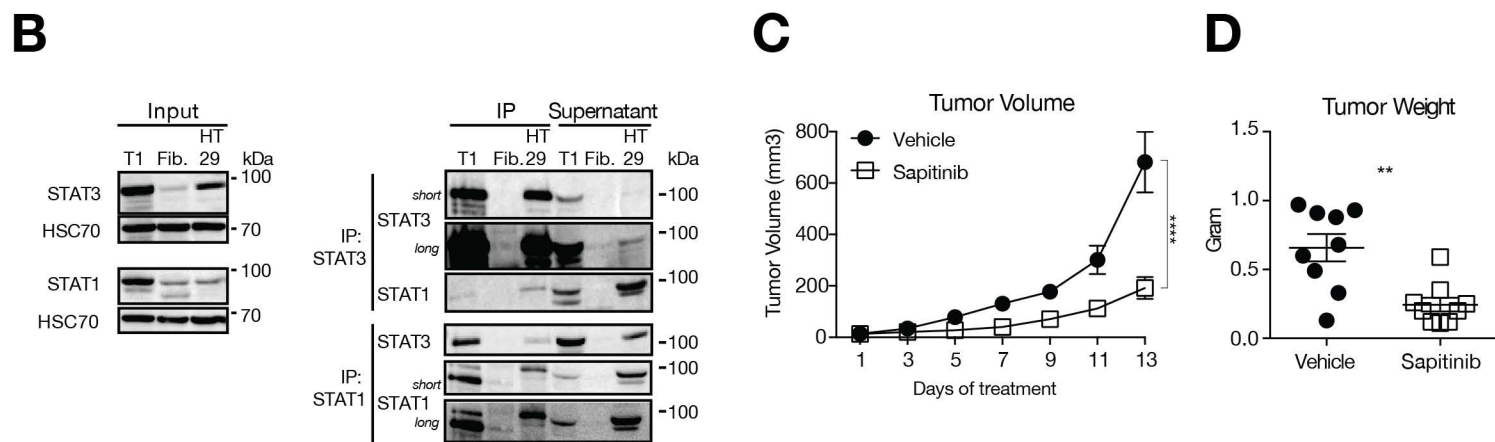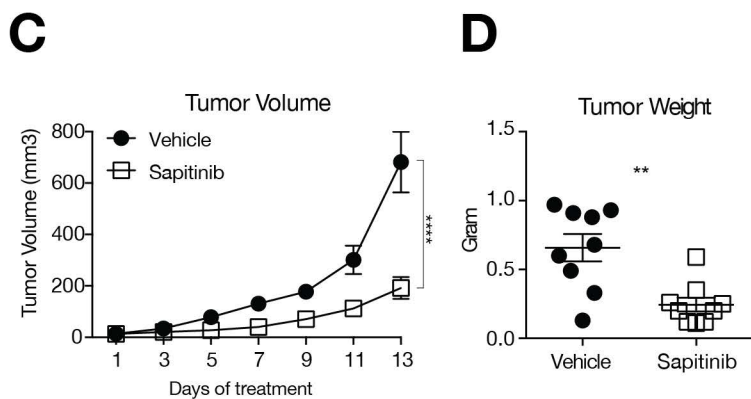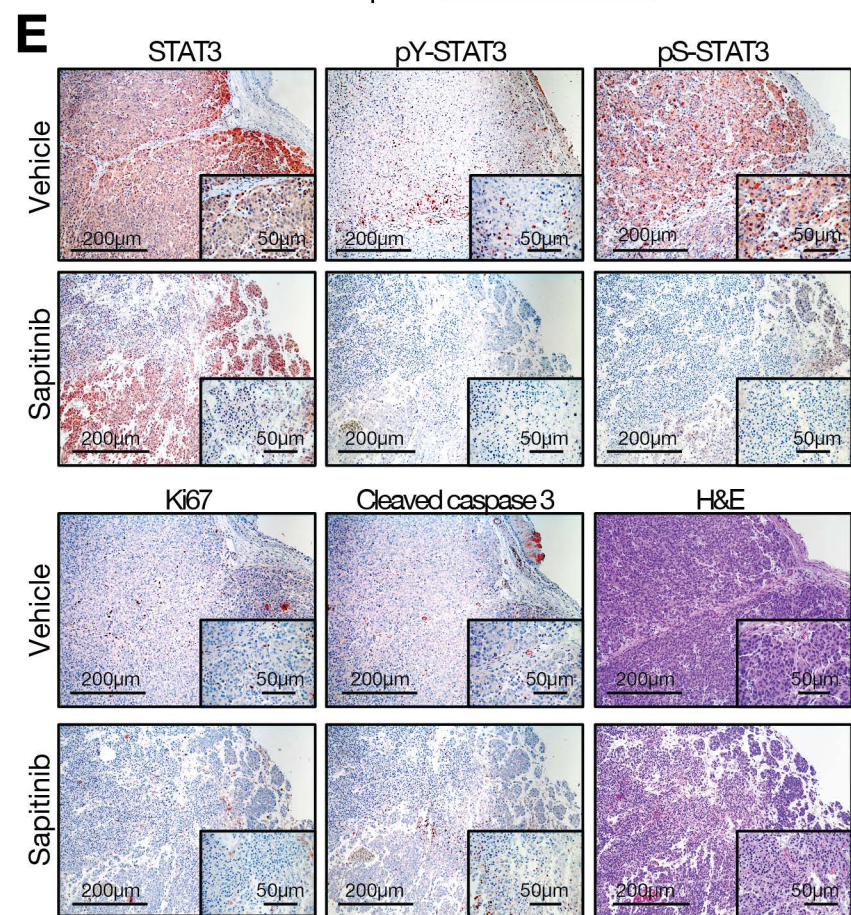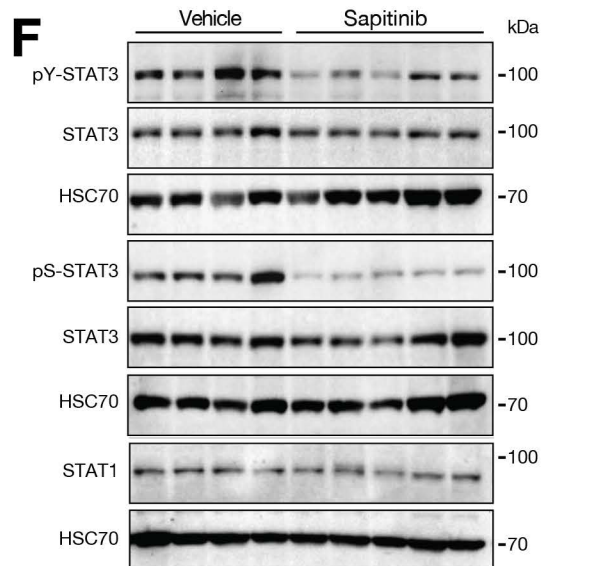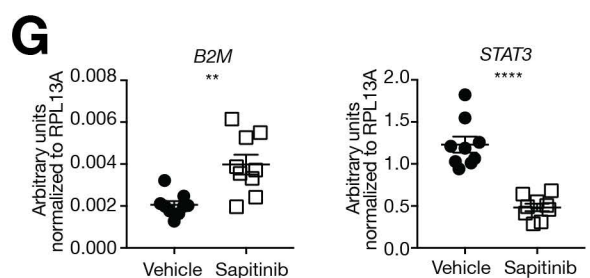

**Figure 4**



# Working model

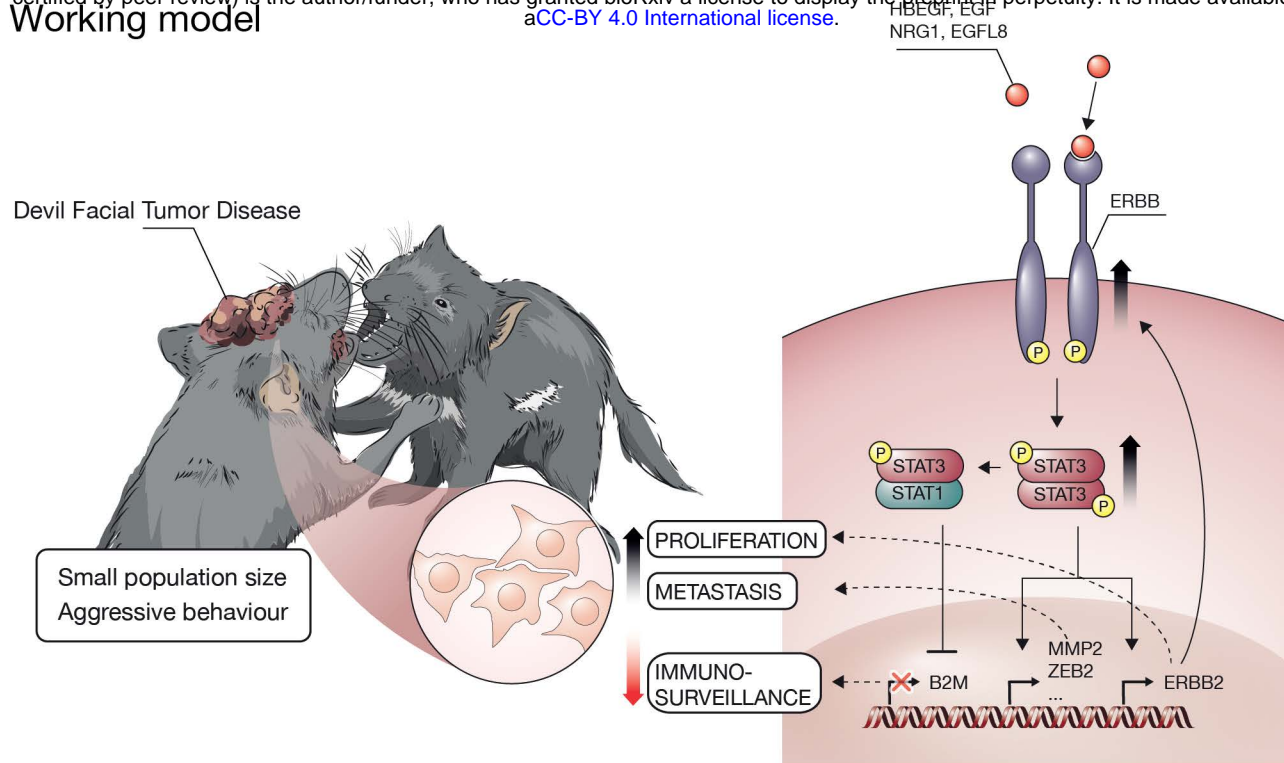

**Figure 5**

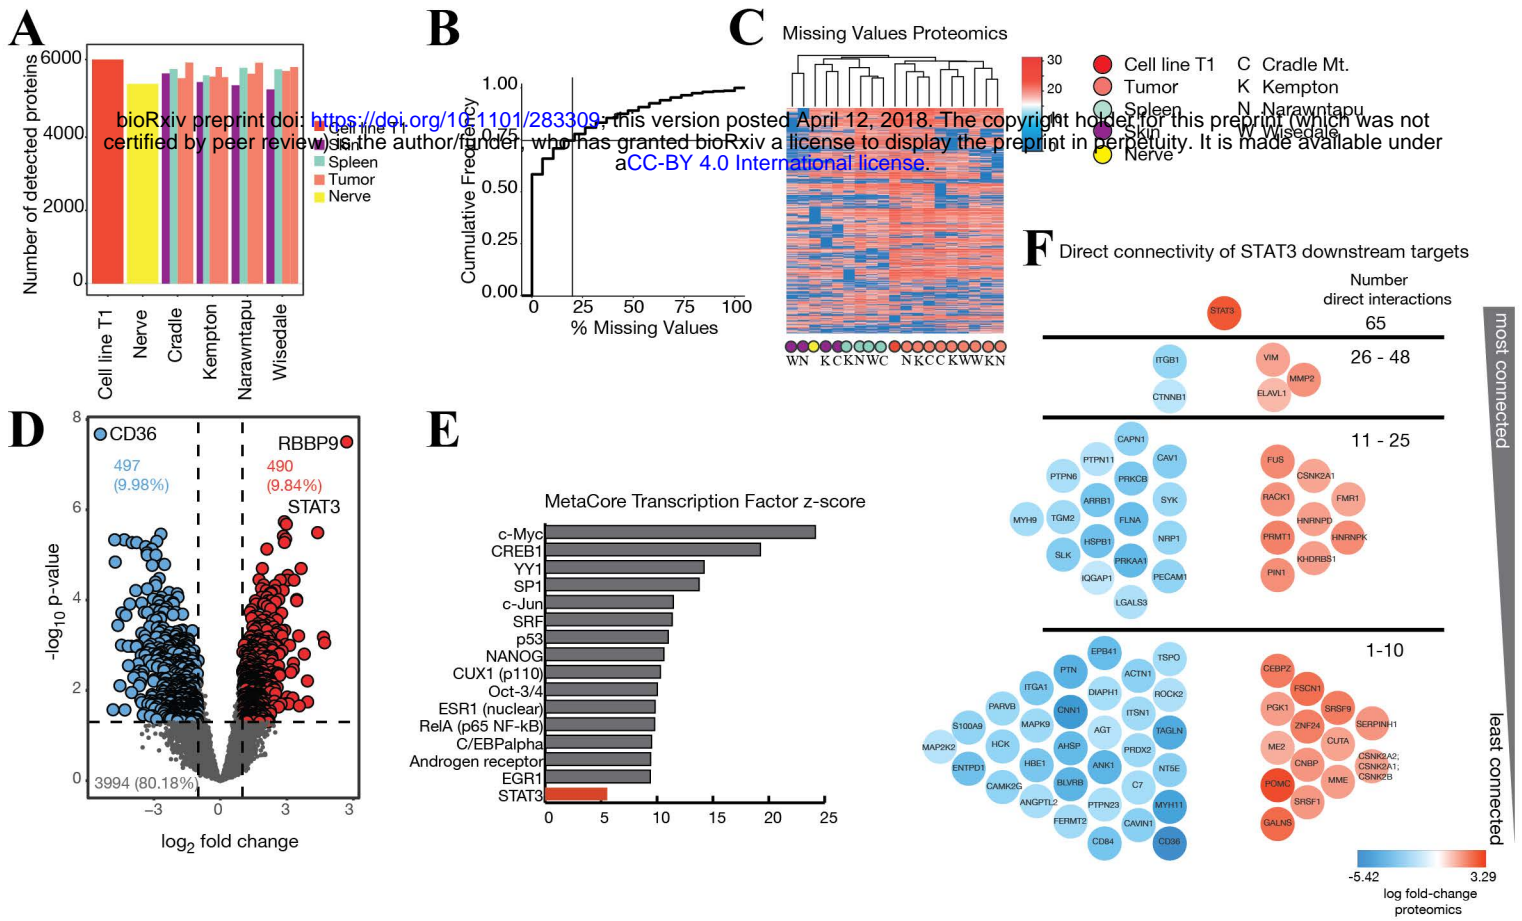

**Figure S1**

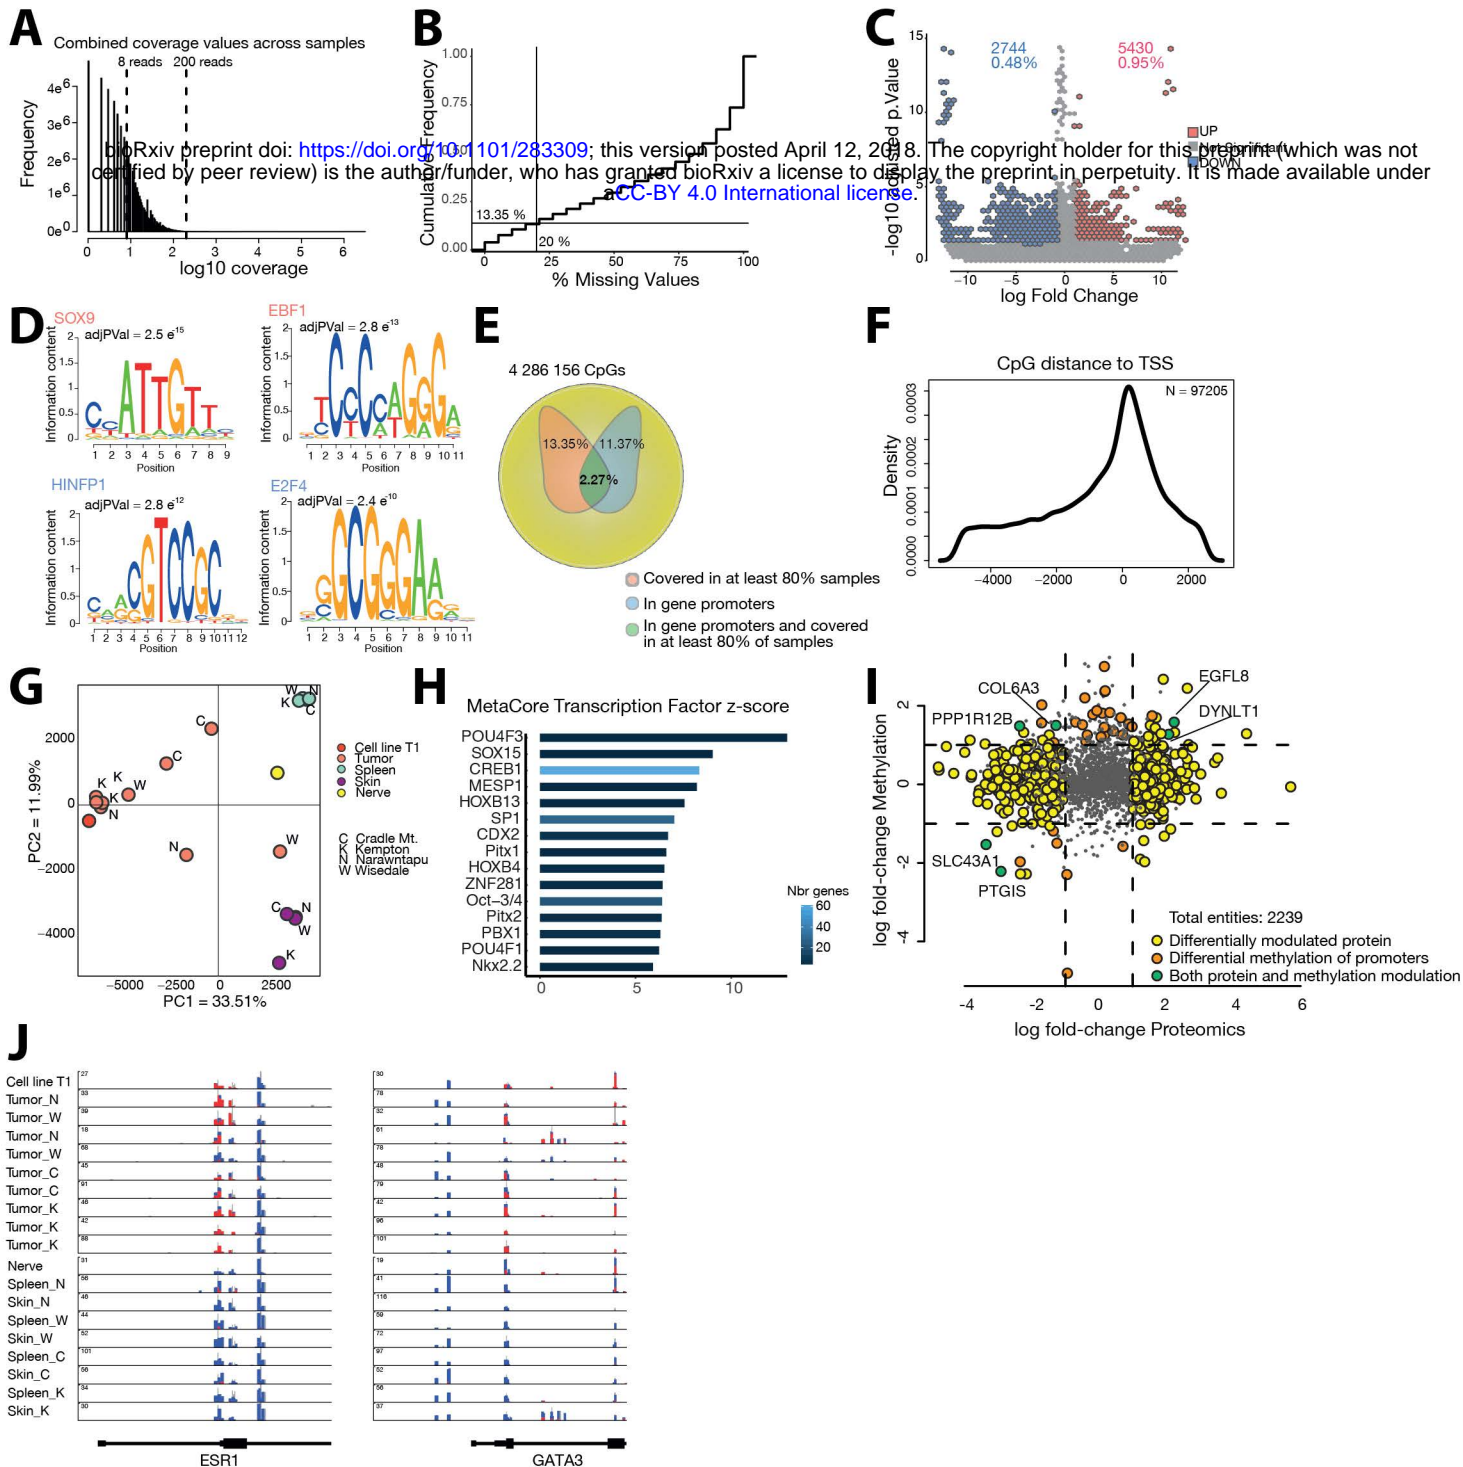

**Figure S2**

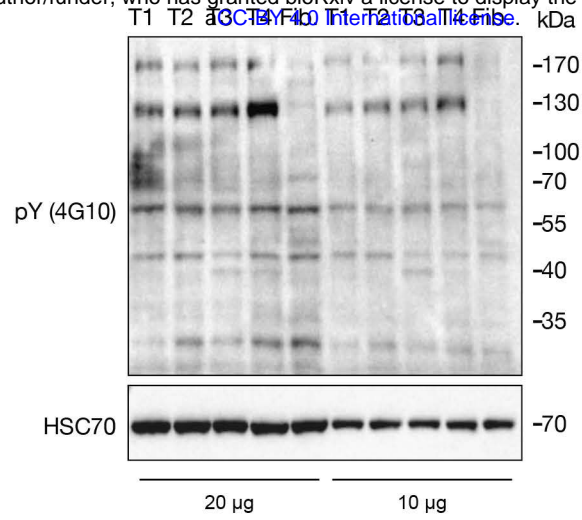

**Figure S3**

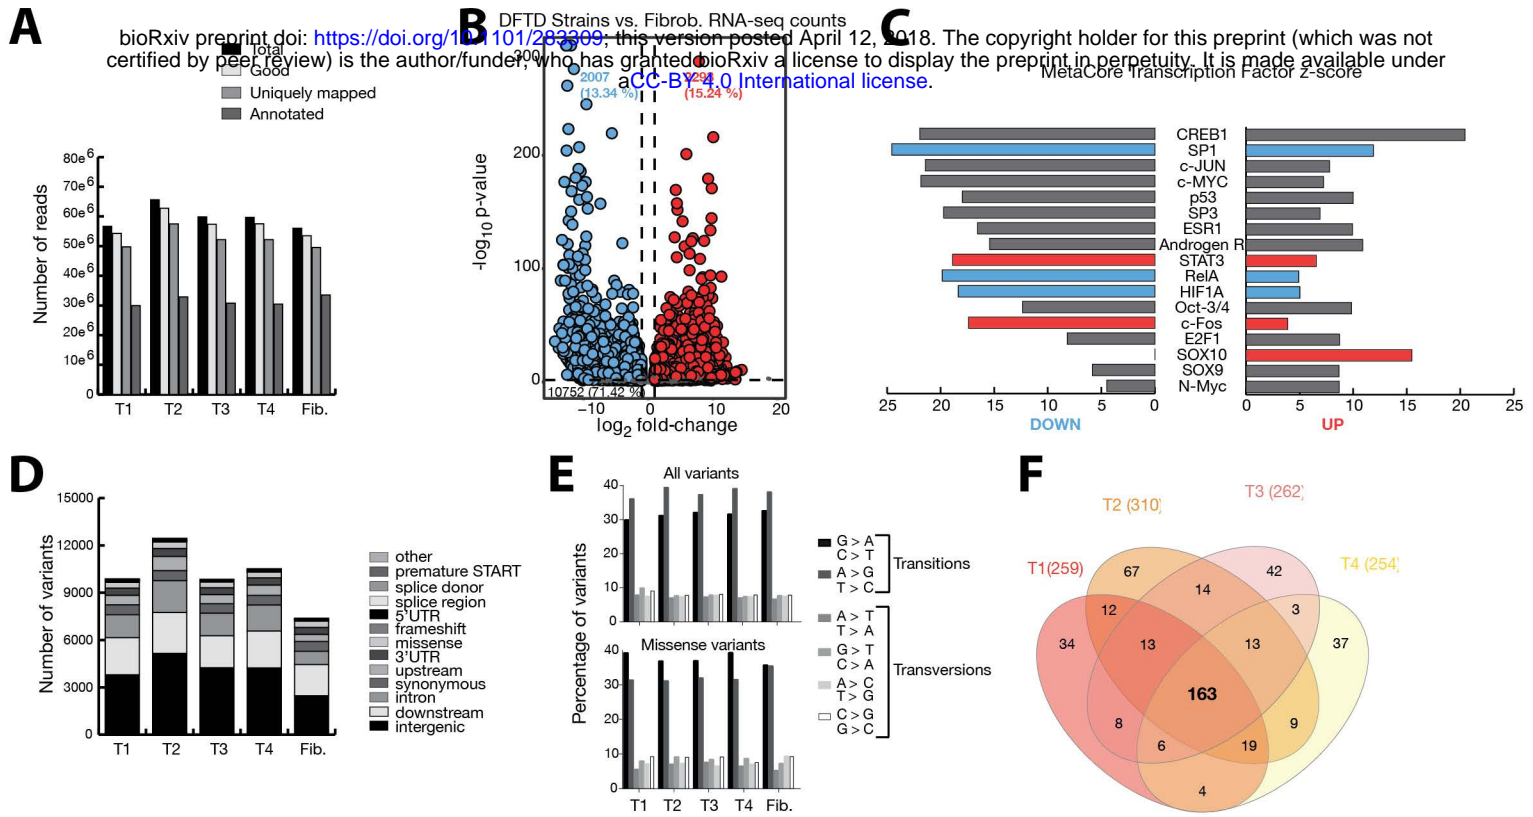

**Figure S4**

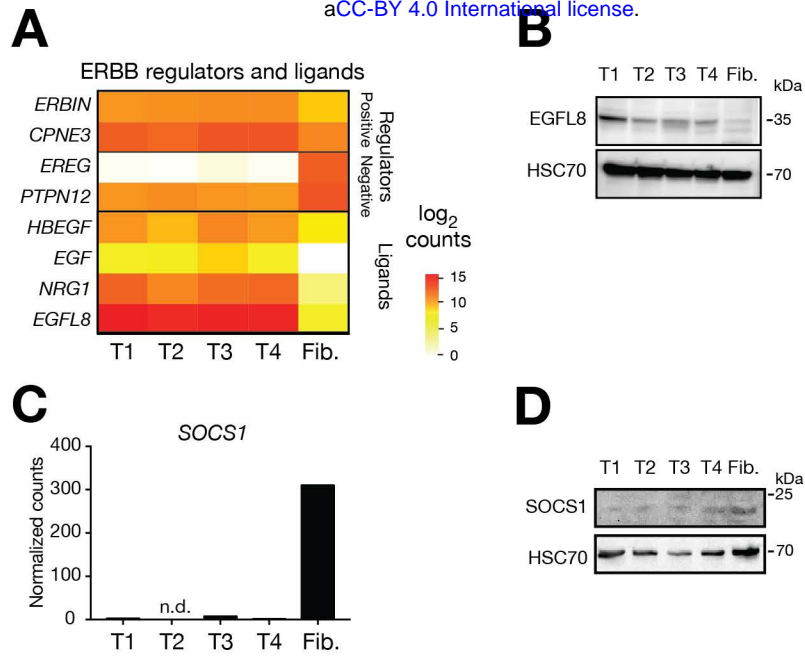

**Figure S5**

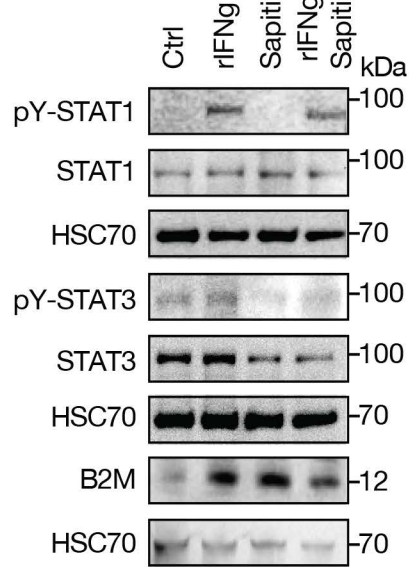

**Figure S6**



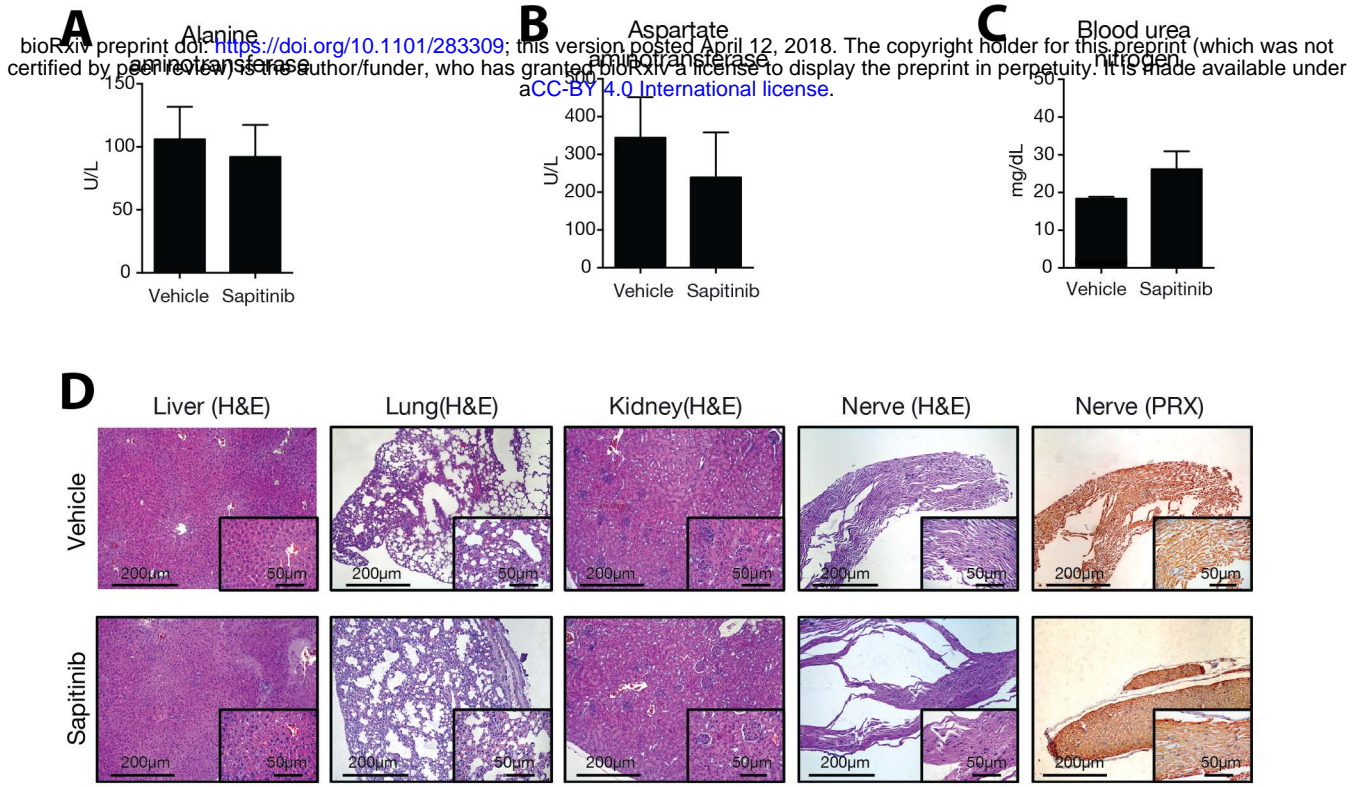

**Figure S7**
